# Supplementary material for: Efficient control of movement in non-photoresponsive molecular machines by a photo-induced proton-transfer strategy
Source: Royal Society of Chemistry journal article supplement (doi:10.1039/c8cc01570h), 2018-01-01
Supplement: c8cc01570h1.pdf [file c8cc01570h1.pdf]

## Electronic Supplementary Information

### Efficient control of movements in non-photoresponsive molecular machines by photo-induced proton-transfer strategy

Qiang Shi,<sup>a,b</sup> Zheng Meng,<sup>a</sup> Jun-Feng Xiang<sup>a</sup> and Chuan-Feng Chen<sup>a,b,\*</sup>

<sup>a</sup>*Beijing National Laboratory for Molecular Sciences, CAS Key Laboratory of Molecular Recognition and Function, Institute of Chemistry, Chinese Academy of Sciences, Beijing 100190, China.* <sup>b</sup>*University of Chinese Academy of Sciences, Beijing 100049, China.*

Email: cchen@iccas.ac.cn

### Contents

|                                                                                      |     |
|--------------------------------------------------------------------------------------|-----|
| 1. Materials and methods.....                                                        | S2  |
| 2. <sup>1</sup> H NMR study of the association of HA with G1.....                    | S2  |
| 3. <sup>1</sup> H NMR study of photo-induced motion of HA on G1.....                 | S3  |
| 4. Synthesis of new compounds.....                                                   | S3  |
| 5. Characterization of new compounds.....                                            | S10 |
| 6. Variable-temperature <sup>1</sup> H NMR experiments.....                          | S26 |
| 7. CD spectra of chiral rotaxanes.....                                               | S28 |
| 8. Acid-base controlled motion.....                                                  | S29 |
| 9. NMR study of photo controlled motion of R2 and R3.....                            | S31 |
| 10. Time-dependent <sup>1</sup> H NMR study of photo-driven motion.....              | S32 |
| 11. Sustainability of acid-base controlled and photo controlled motion patterns..... | S33 |

## 1. Materials and methods

*P*- and *M*-**HA** was prepared according to literature procedure.<sup>S1</sup> Unless otherwise indicated, all reagents were obtained from commercial sources. Melting points were determined using WRR melting point apparatus, and were not corrected. <sup>1</sup>H NMR spectra were recorded on the Bruker DMX300 NMR and Bruker® Avance III 500 MHz NMR spectrometer. Electrospray ionization mass spectra (ESI-MS) were recorded on the Thermo Fisher® Exactive high-resolution LC-MS spectrometer. All solvents used, except THF and H<sub>2</sub>O, were dried through 4A molecular sieve.

## 2. <sup>1</sup>H NMR study of the association of HA with G1

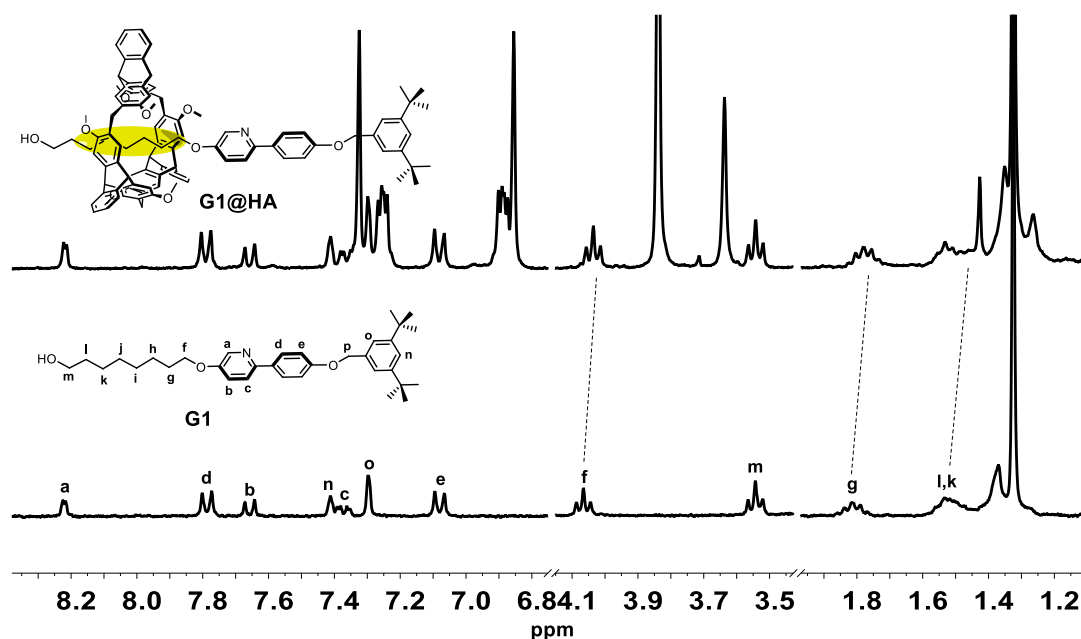

**Fig. S1.** Association of **HA** with **G1** (300 MHz, CD<sub>3</sub>OD/CD<sub>2</sub>Cl<sub>2</sub> = 11:5 v/v, 298 K). Compared with the <sup>1</sup>H NMR spectrum of **G1**, the aromatic protons and H<sup>m</sup> of **G1@HA** have no chemical shifts while the proton H<sup>f</sup>-H<sup>l</sup> slightly upshifted, indicating **HA** inclined to located at the position of H<sup>f</sup> to H<sup>l</sup>.

### 3. $^1\text{H}$ NMR study of photo-induced motion of HA on G1

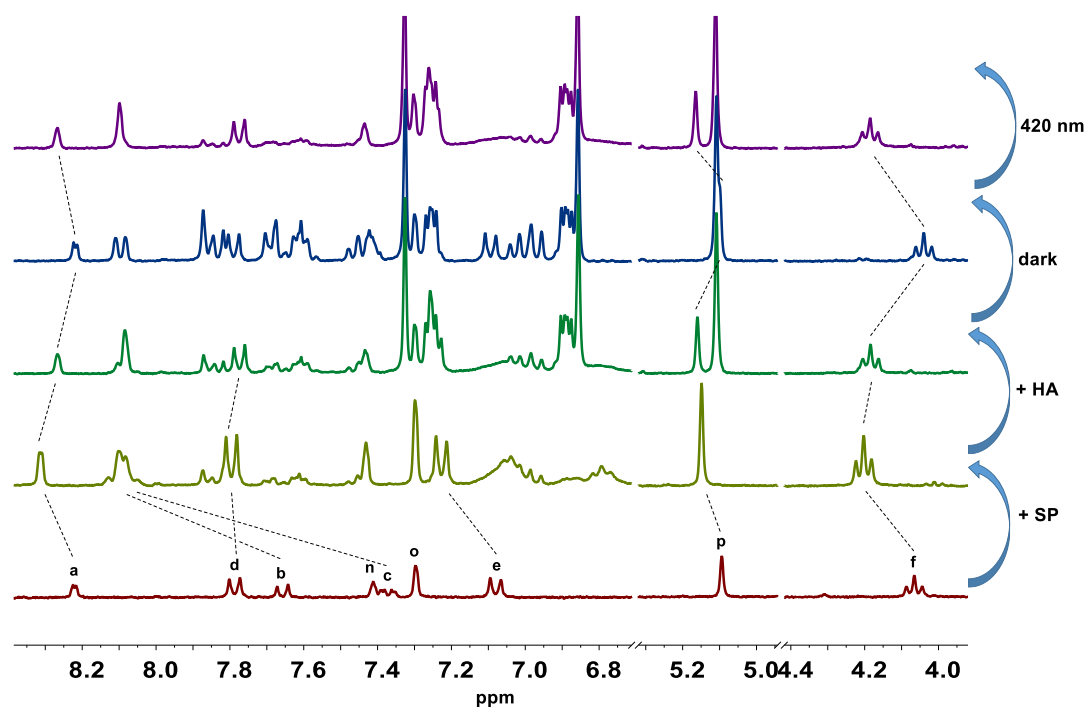

**Fig. S2.** Photo acid induced association and disassociation of **HA** with the pyridine part of **G1** (300 MHz,  $\text{CD}_3\text{OD}/\text{CD}_2\text{Cl}_2 = 11:5$  v/v, 298 K).

### 4. Synthesis of new compounds

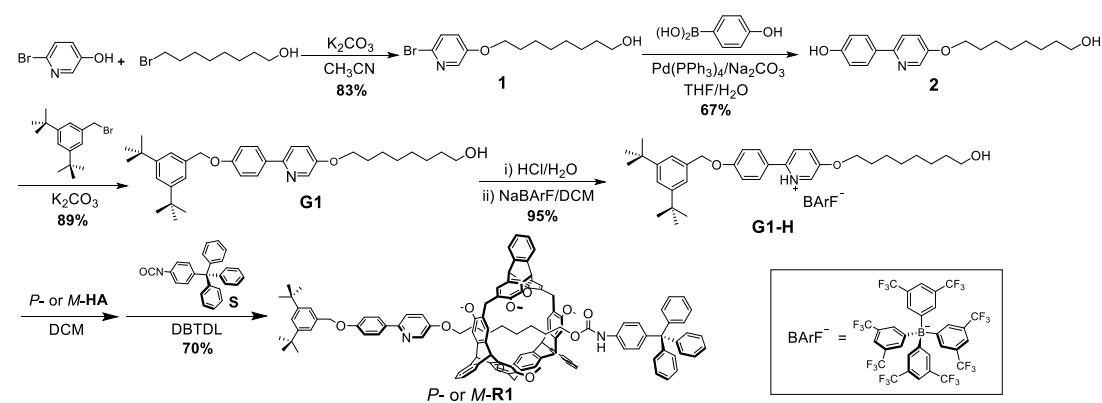

**Scheme S1.** Synthetic route of [2]rotaxane *P-* or *M-R1*.

**Synthesis of 1.** A mixture of 6-bromopyridin-3-ol (1.0 g, 5.7 mmol), 8-bromo-1-octanol (1.4 g, 6.9 mmol) and anhydrous potassium carbonate (1.5 g) were refluxed in

dried acetonitrile for 8 h. Then the solution was cooled to room temperature and remove the insoluble matter by filtration. After the solvent was removed under reduced pressure, the yellow oily liquid was further purified by silica gel chromatography with petroleum ether/ethyl acetate = 1:1 (v/v) to give a colorless oily liquid product **1** (1.4 g, 83%). <sup>1</sup>H NMR (500 MHz, CD<sub>3</sub>CN, 298 K) δ (ppm): 8.03 (d, *J* = 5 Hz, 1H), 7.42 (d, *J* = 10 Hz, 1H), 7.23-7.20 (m, 1H), 4.01 (t, *J* = 5 Hz, 2H), 3.47 (t, *J* = 5 Hz, 2H), 1.78-1.72 (m, 2H), 1.48-1.30 (m, 10H). <sup>13</sup>C NMR (125 MHz, CD<sub>3</sub>CN, 298 K) δ (ppm): 156.3, 138.7, 132.1, 129.1, 125.9, 69.8, 62.5, 33.5, 30.0, 29.9, 29.7, 26.5, 26.4. HRMS (ESI): *m/z* calcd for [M+H]<sup>+</sup> (C<sub>13</sub>H<sub>21</sub>BrO<sub>2</sub>N<sup>+</sup>), 301.0672; found *m/z* 301.0671.

**Synthesis of 2.** Compound **1** (1.0 g, 3.3 mmol) and 4-hydroxyphenylboronic acid (0.45 g, 3.3 mmol) were dissolved in THF (100 ml) and H<sub>2</sub>O (60 ml). Then anhydrous Na<sub>2</sub>CO<sub>3</sub> (13 g, 2M) was added. After argon was injected into the solution for 0.5 h, tetrakis (triphenylphosphine) palladium (200 mg, 0.17 mmol) was added. The mixture was heated to 70 °C overnight and then cooled to room temperature. The mixture was washed with DCM. Then the organic layer was collected and dried with anhydrous MgSO<sub>4</sub>. After solvent was evaporated in vacuum, the crude product was further purified by chromatography with petroleum ether/ethyl acetate = 1:2 (v/v) to give a yellow solid **2** (0.7 g, 67%). M. p.: 129.3-130.3 °C. <sup>1</sup>H NMR (500 MHz, CD<sub>3</sub>CN, 298 K) δ (ppm): 8.27 (d, *J* = 5 Hz, 1H), 7.84-7.82 (m, 2H), 7.66 (d, *J* = 10 Hz, 1H), 7.32-7.30 (m, 1H), 7.03 (s, 1H), 6.88-6.86 (m, 2H), 4.06 (t, *J* = 5 Hz, 2H), 3.50-3.46 (m, 2H), 1.82-1.75 (m, 2H), 1.48-1.33 (m, 10 H). <sup>13</sup>C NMR (125 MHz, CD<sub>3</sub>CN, 298 K) δ (ppm): 158.2, 155.0, 150.2, 138.2, 132.0, 128.4, 122.8, 120.7, 116.3, 69.4, 62.5, 33.6,

30.1, 30.0, 29.8, 26.5, 26.5. HRMS (ESI):  $m/z$  calcd for  $[M+H]^+$  ( $C_{19}H_{25}O_3N^+$ ), 315.1837; found  $m/z$  315.1830.

**Synthesis of G1.** Compound **2** (0.5 g, 1.6 mmol) and 3, 5-di-tert-butylbenzyl bromide (0.5 g, 1.9 mmol) was dissolved in acetonitrile. After anhydrous  $K_2CO_3$  (1.0 g) was added, the mixture was reflux for 6 h. And then purified by chromatography with DCM to give a yellow-brown powder **G1** (0.73 g, 89%). M. p.: 80.7-82.2 °C.  $^1H$  NMR (500 MHz,  $DMSO-d_6$ , 298 K)  $\delta$  (ppm): 8.30 (d,  $J = 5$  Hz, 1H), 7.96-7.94 (m, 2H), 7.82-7.80 (m, 1H), 7.43-7.40 (m, 1H), 7.36 (s, 1H), 7.30 (s, 2H), 7.10-7.08 (m, 2H), 5.10 (s, 2H), 4.05 (t,  $J = 5$  Hz, 2H), 3.38 (t,  $J = 5$  Hz, 2H), 1.74-1.72 (m, 2H), 1.43-1.29 (m, 28H).  $^{13}C$  NMR (125 MHz,  $DMSO-d_6$ , 298 K)  $\delta$  (ppm): 158.7, 153.6, 150.4, 148.3, 137.2, 136.0, 131.2, 127.1, 122.1, 122.0, 121.4, 119.8, 114.9, 70.1, 68.0, 60.7, 34.5, 32.5, 31.3, 28.9, 28.8, 28.6, 25.5, 25.4. HRMS (ESI):  $m/z$  calcd for  $[M+H]^+$  ( $C_{34}H_{48}O_3N^+$ ), 518.3556; found  $m/z$  518.3551.

**Synthesis of G1-H.** Excess HCl (0.16 mL) was added to compound **G1** (0.1 g, 0.19 mmol) in water (2 mL). After stirred at room temperature for 30 min, a solution of NaBARF (0.17 g, 0.2 mmol) in DCM (2 mL) was added. Then, the mixture was stirred overnight and the organic layer was separated, washed with water three times and dried with anhydrous  $MgSO_4$ . The DCM was removed in vacuum to afford **G1-H** as a yellow solid (0.25 g, 95%). M. p.: 51.2-52.5 °C.  $^1H$  NMR (500 MHz,  $CD_3CN$ , 298 K)  $\delta$  (ppm): 8.21 (d,  $J = 5$  Hz, 1H), 8.12-8.14 (m, 2H), 7.79-7.77 (m, 2H), 7.72-7.70 (m, 8H), 7.68 (s, 4H), 7.48 (t,  $J = 5$  Hz, 1H), 7.36 (s, 2H), 7.28-7.26 (m, 2H), 5.19 (s, 2H), 4.21 (t,  $J = 5$  Hz, 2H), 3.50 (t,  $J = 5$  Hz, 2H), 1.86-1.82 (m, 2H), 1.51-1.46 (m, 4H), 1.42-1.31

(m, 24H).  $^{13}\text{C}$  NMR (125 MHz,  $\text{CD}_3\text{CN}$ , 298 K)  $\delta$  (ppm): 162.9, 162.6 (q,  $^1J_{\text{CB}} = 50$  Hz), 157.2, 152.2, 146.1, 136.6, 135.6, 135.0, 130.2, 130.0 (m), 127.9, 127.2, 125.4 (q,  $^1J_{\text{CF}} = 275$  Hz), 123.5, 123.4, 123.4, 117.1, 71.8, 71.5, 62.5, 35.5, 33.5, 31.6, 30.0, 29.8, 29.3, 26.5, 26.3. HRMS (ESI):  $m/z$  calcd for  $[\text{M-BArF}]^+$  ( $\text{C}_{34}\text{H}_{48}\text{O}_3\text{N}^+$ ), 518.3629; found  $m/z$  518.3631.

**Synthesis of *P*- or *M*-R1.** Compound **G1-H** (0.35 g, 0.26 mmol) and *P*- or *M*-**HA** (50 mg, 0.05 mmol) was dissolved in DCM (0.5 ml) and the solution was stirred for 2 h. After **S** (0.12 g, 0.33 mmol) and 2 drops of DBTDL (Dibutyltin dilaurate) was added, the mixture was stirred for another 2 h. And then purified through chromatography with DCM to afford *P*- or *M*-**HA** as a white solid (66 mg, 70%). M. p.: 156.9-157.1 °C.  $^1\text{H}$  NMR (500 MHz,  $\text{CD}_3\text{OD}/\text{CD}_2\text{Cl}_2 = 11:5$  v/v, 298 K)  $\delta$  (ppm): 8.03 (s, 1H), 8.03-8.02 (m, 2H), 7.92 (d,  $J = 10$  Hz, 1H), 7.53 (d,  $J = 5$  Hz, 2H), 7.45 (t,  $J = 5$  Hz, 1H), 7.41 (s, 3H), 7.36-7.35 (m, 6H), 7.28-7.17 (m, 25H), 6.89-6.84 (m, 9H), 6.70 (s, 3H), 5.17 (s, 2H), 5.12-5.11 (m, 6H), 3.94-3.88 (m, 2H), 3.82 (s, 8H), 3.68-3.67 (m, 16H), 2.77-2.67 (br, 2H), 1.44-0.88 (m, 18H), 0.90-0.88 (br, 2H), -0.07 (s, 4H), -1.00 (s, 2H), -1.14 (s, 2H), -1.16 (s, 2H).  $^{13}\text{C}$  NMR (125 MHz,  $\text{CD}_3\text{OD}/\text{CD}_2\text{Cl}_2 = 11:5$  v/v, 298 K)  $\delta$  (ppm): 160.5, 155.4, 155.0, 154.9, 152.0, 150.5, 148.0, 147.6, 147.6, 145.6, 145.5, 142.6, 138.3, 138.2, 138.0, 137.9, 137.2, 132.9, 132.6, 131.9, 128.7, 128.3, 127.5, 127.5, 126.8, 126.3, 126.2, 125.4, 125.4, 123.7, 123.0, 122.9, 122.0, 118.8, 116.1, 108.2, 108.0, 71.8, 69.1, 65.5, 56.4, 56.3, 35.5, 31.8, 29.0, 28.1, 27.7, 27.5, 25.2, 24.3. HRMS (ESI):  $m/z$  calcd for  $[\text{M}+\text{H}]^+$  ( $\text{C}_{129}\text{H}_{124}\text{O}_{10}\text{N}_2^+$ ), 1860.9211; found  $m/z$  1860.9209.

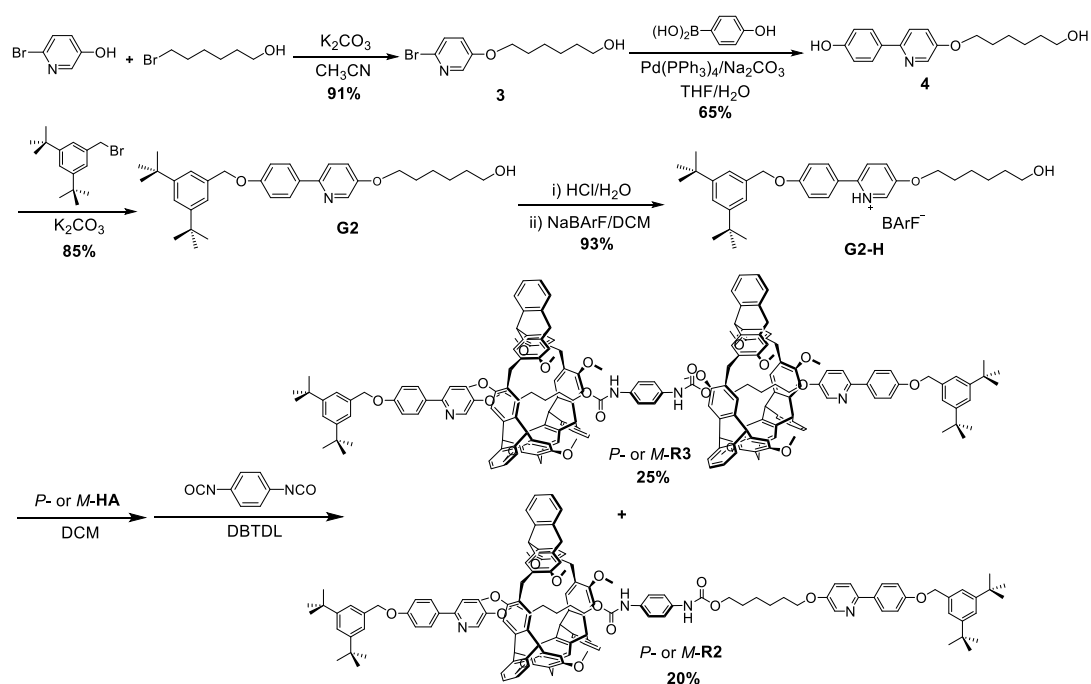

**Scheme S2.** Synthetic route of *P*- or *M*-R2 and *P*- or *M*-R3.

**Synthesis of 3.** The method to synthesize compound **3** is the same with **1**. Compound **3** was given as a colorless liquid (1.43 g, 91%). <sup>1</sup>H NMR (500 MHz, CD<sub>3</sub>CN, 298 K) δ (ppm): 8.06 (d, *J* = 5 Hz, 1H), 7.45 (d, *J* = 10 Hz, 1H), 7.26-7.23 (m, 1H), 4.04 (t, *J* = 5 Hz, 2H), 3.51 (q, *J* = 5 Hz, 2H), 1.83-1.76 (m, 2H), 1.58-1.35 (m, 6H). <sup>13</sup>C NMR (125 MHz, CD<sub>3</sub>CN, 298 K) δ (ppm): 156.2, 138.7, 132.2, 129.1, 125.9, 69.7, 62.4, 33.4, 29.7, 26.3, 26.3. HRMS (ESI): *m/z* calcd for [M+H]<sup>+</sup> (C<sub>11</sub>H<sub>17</sub>BrNO<sub>2</sub><sup>+</sup>), 273.0364; found *m/z* 273.0360.

**Synthesis of 4.** The method to synthesize compound **4** is the same with **2**. Compound **4** was given as a yellow solid (0.68 g, 65%). M. p.: 148.8-150.1 °C. <sup>1</sup>H NMR (500 MHz, CD<sub>3</sub>CN, 298 K) δ (ppm): 8.30 (s, 1H), 7.87-7.85 (m, 2H), 7.70 (d, *J* = 10 Hz, 1H), 7.35-7.33 (m, 1H), 7.06 (s, 1H), 6.91-6.89 (m, 2H), 4.09 (t, *J* = 5 Hz, 2H), 3.52 (q, *J* = 5 Hz, 2H), 1.83-1.79 (m, 2H), 1.56-1.41 (m, 6H). <sup>13</sup>C NMR (125 MHz, CD<sub>3</sub>CN,

298 K)  $\delta$  (ppm): 158.2, 155.0, 150.2, 138.2, 132.0, 128.4, 122.8, 120.6, 116.3, 69.3, 62.5, 33.5, 29.9, 26.4, 26.3. HRMS (ESI):  $m/z$  calcd for  $[M+H]^+$  ( $C_{17}H_{22}NO_3^+$ ), 288.1522; found  $m/z$  288.1520.

**Synthesis of G2.** The method to synthesize **G2** is the same with **G1**. **G2** was given as colorless liquid (0.72 g, 85%).  $^1H$  NMR (500 MHz,  $CD_3CN$ , 298 K)  $\delta$  (ppm): 8.28 (s, 1H), 7.93-7.91 (m, 2H), 7.69 (d,  $J = 10$  Hz, 1H), 7.46 (s, 1H), 7.34 (s, 2H), 7.32-7.28 (m, 1H), 7.08-7.06 (m, 2H), 5.10 (s, 2H), 4.06 (t,  $J = 5$  Hz, 2H), 3.50 (t,  $J = 5$  Hz, 2H), 1.81-1.77 (m, 2H), 1.53-1.43 (m, 6H), 1.32 (s, 18H).  $^{13}C$  NMR (125 MHz,  $CD_3CN$ , 298 K)  $\delta$  (ppm): 160.1, 155.1, 152.0, 149.9, 138.3, 137.4, 132.8, 128.3, 123.4, 123.0, 122.7, 120.8, 115.9. HRMS (ESI):  $m/z$  calcd for  $[M+H]^+$  ( $C_{32}H_{44}NO_3^+$ ), 490.3243; found  $m/z$  490.3240.

**Synthesis of G2-H.** The method to synthesize **G2-H** is the same with **G2-H**. **G2-H** was given as a yellow solid (0.2 g, 93%). M. p.: 53.3-55.6 °C.  $^1H$  NMR (500 MHz,  $CD_3CN$ , 298 K)  $\delta$  (ppm): 8.23 (s, 1H), 8.16-8.12 (m, 2H), 7.80-7.78 (m, 2H), 7.74-7.70 (m, 8H), 7.69 (s, 4H), 7.50 (s, 1H), 7.38 (s, 2H), 7.29-7.28 (m, 2H), 5.21 (s, 2H), 4.24 (t,  $J = 5$  Hz, 2H), 3.54 (t,  $J = 5$  Hz, 2H), 1.91-1.85 (m, 2H), 1.57-1.43 (m, 6H), 1.35 (s, 18H).  $^{13}C$  NMR (125 MHz,  $CD_3CN$ , 298 K)  $\delta$  (ppm): 162.9, 162.6 (q,  $^1J_{CB} = 200$  Hz), 157.2, 152.2, 146.1, 136.6, 135.6, 135.0, 130.3, 130.2, 129.9 (m), 128.7, 127.9, 127.2, 126.5, 124.8, 124.3, 124.2, 123.5, 123.4, 123.4, 122.2, 117.1, 71.8, 71.5, 62.4, 35.5, 33.4, 31.6, 31.6, 29.4, 26.2, 26.2. HRMS (ESI):  $m/z$  calcd for  $[M-BArF]^+$  ( $C_{32}H_{44}NO_3^+$ ), 490.3312; found  $m/z$  490.3324.



**Synthesis of *P*- or *M*-**R2** and *P*- or *M*-**R3**.** *P*- or *M*-**HA** (50 mg, 0.05 mmol) and **G2-H** (70 mg, 0.05 mmol) were dissolved in dried CH<sub>2</sub>Cl<sub>2</sub> (0.5 ml). After stirred 2 h, 1, 4-phenylene diisocyanate (10 mg, 0.07 mmol) and 2 drops of DBTDL was added and continued to stir for two hours. Then the mixture was purified by silica gel chromatography with DCM as eluent to afford *P*- or *M*-**R2** (22 mg, 20%, M. p.: 134.2-135.1 °C) and *P*- or *M*-**R3** (40 mg, 25%, M. p.: 197.0-203.1 °C) simultaneously as white solid. <sup>1</sup>H NMR (500 MHz, CD<sub>3</sub>OD/CD<sub>2</sub>Cl<sub>2</sub> = 11:5 v/v, 298 K) for **R2** δ (ppm): 8.19 (d, *J* = 5 Hz, 2H), 7.94 (d, *J* = 10 Hz, 4H), 7.78 (d, *J* = 5 Hz, 2H), 7.58 (s, 4H), 7.45 (s, 2H), 7.42 (s, 6H), 7.34 (s, 4H), 7.26-7.26 (m, 6H), 7.24-7.21 (m, 2H), 7.17 (d, *J* = 10 Hz, 4H), 6.91-6.89 (m, 6H), 6.79 (s, 6H), 5.17 (s, 4H), 5.14 (s, 4H), 3.74 (m, 24H), 2.29 (m, 6H), 2.04 (m, 6H), 1.61 (m, 12H), 1.35-1.29 (m, 36H). <sup>13</sup>C NMR (125 MHz, CD<sub>3</sub>OD/CD<sub>2</sub>Cl<sub>2</sub> = 11:5 v/v, 298 K) for **R2** δ (ppm): 159.4, 153.9, 151.0, 146.5, 142.9, 142.0, 140.1, 138.2, 137.3, 136.8, 134.5, 133.6, 129.6, 129.5, 127.6, 126.4, 125.2, 124.4, 122.7, 121.9, 121.8, 120.9, 115.0, 107.0, 70.7, 67.9, 55.2, 34.5, 31.7, 29.5, 29.4, 29.4, 29.3, 29.1, 29.0, 28.0, 26.9, 24.9, 22.4, 13.3. MS (MALDI-TOF): *m/z* calcd for [M+H]<sup>+</sup> (C<sub>141</sub>H<sub>147</sub>N<sub>4</sub>O<sub>14</sub><sup>+</sup>), 2121.09; found *m/z* 2121.07.

<sup>1</sup>H NMR (300 MHz, CD<sub>2</sub>Cl<sub>2</sub>, 298 K) for **R3** δ (ppm): 8.27 (d, *J* = 3 Hz, 2H), 8.18 (d, *J* = 9 Hz, 4H), 7.93-7.90 (m, 6H), 7.50 (s, 6H), 7.45 (s, 6H), 7.43 (s, 2H), 7.40 (s, 4H), 7.32-7.18 (m, 18H), 6.95-6.92 (m, 18H), 6.72 (s, 6H), 5.21 (s, 6H), 5.18 (s, 4H), 5.12 (s, 6H), 3.94 (s, 18H), 3.75 (s, 12H), 3.68 (s, 18H), 3.11 (m, 4H), 2.53 (m, 4H), 1.41-1.31 (m, 36H), -0.21 (s, 4H), -0.44 (s, 4H), -1.55 (s, 8H). <sup>13</sup>C NMR (125 MHz, CD<sub>3</sub>OD/CD<sub>2</sub>Cl<sub>2</sub> = 11:5 v/v, 298 K) for **R3** δ (ppm): 154.9, 154.8, 152.0, 147.5, 147.4,

145.6, 145.5, 138.2, 138.0, 135.5, 128.6, 127.5, 127.4, 126.2, 126.1, 125.4, 123.7, 122.9, 122.9, 121.7, 116.0, 108.2, 107.9, 107.9, 71.7, 68.5, 56.4, 56.2, 35.5, 31.8, 29.0, 27.3, 23.2, 23.0. MS (MALDI-TOF):  $m/z$  calcd for  $[M+H]^+$  ( $C_{211}H_{209}N_4O_{20}^+$ ), 3120.54; found  $m/z$  3120.59.

## 5. Characterization of new compounds

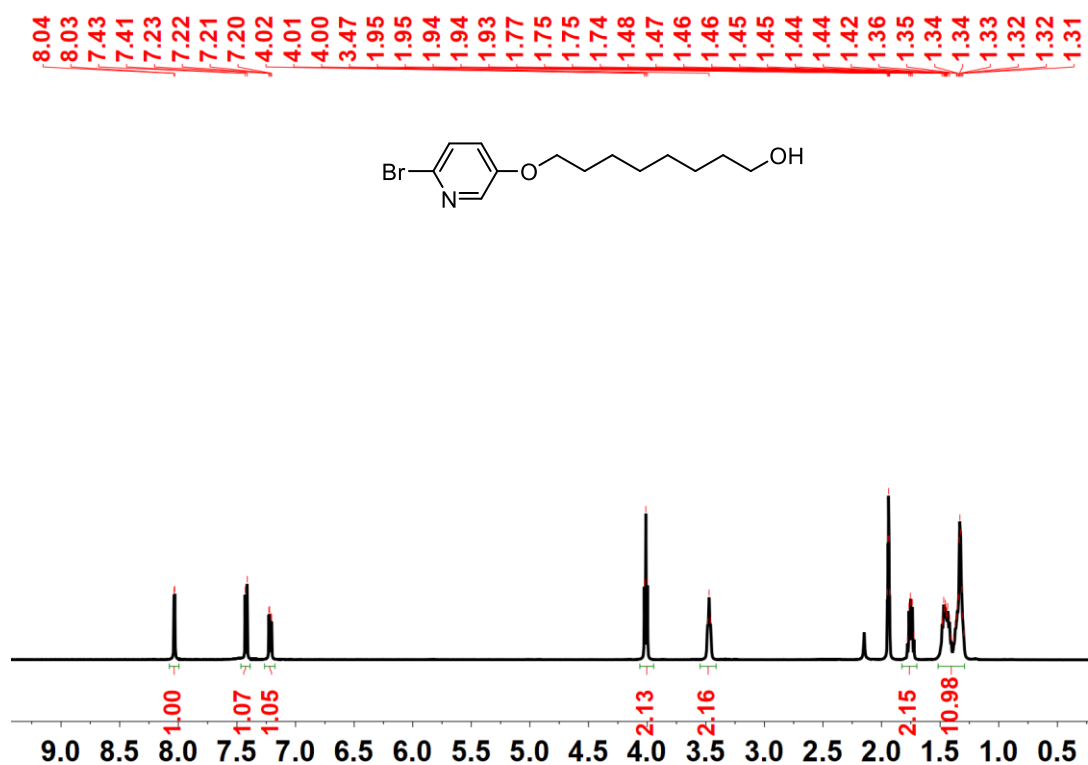

**Fig. S3.**  $^1H$  NMR spectrum (500 MHz,  $CD_3CN$ , 298 K) of compound 1.

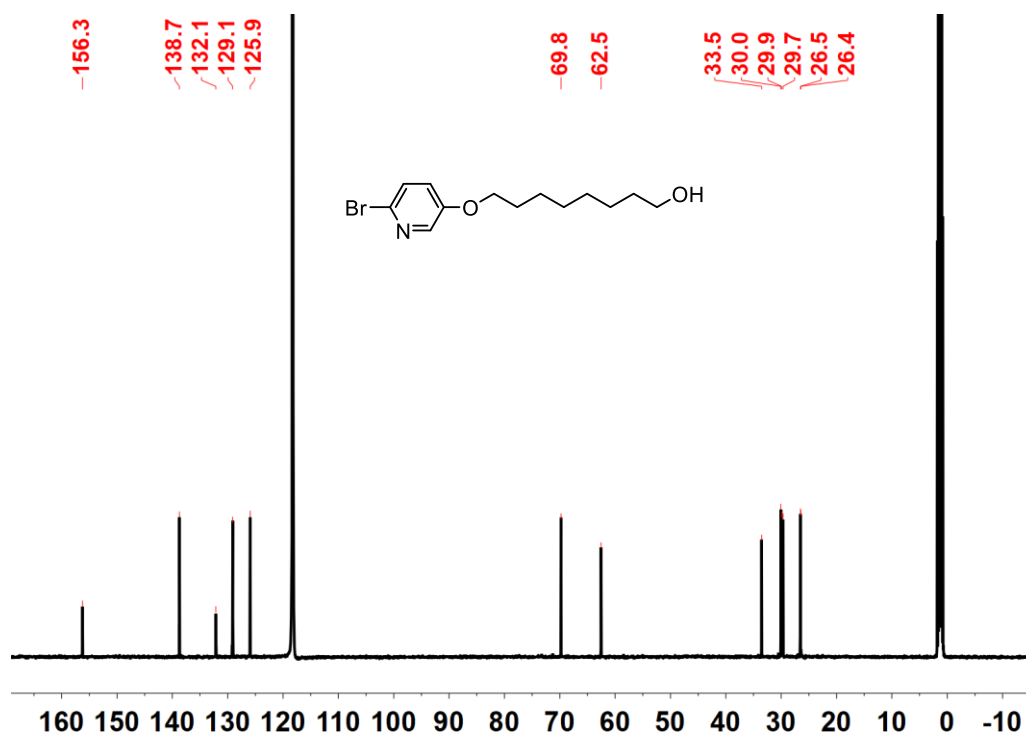

Fig. S4. <sup>13</sup>C NMR spectrum (125 MHz, CD<sub>3</sub>CN, 298 K) of compound 1.

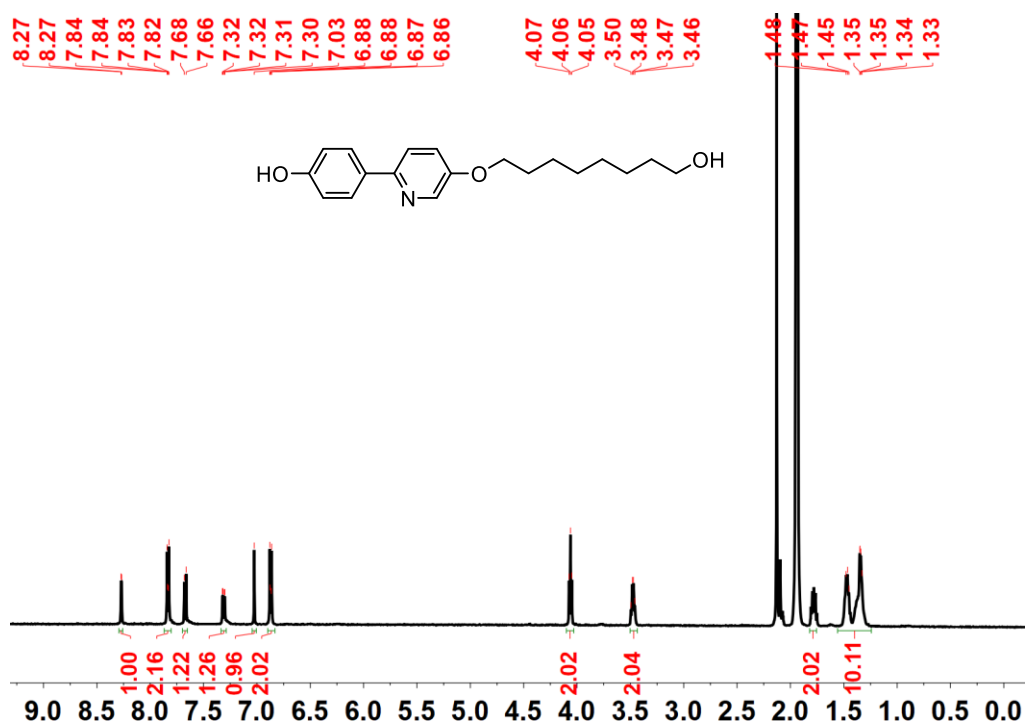

Fig. S5. <sup>1</sup>H NMR spectrum (500 MHz, CD<sub>3</sub>CN, 298 K) of compound 2.

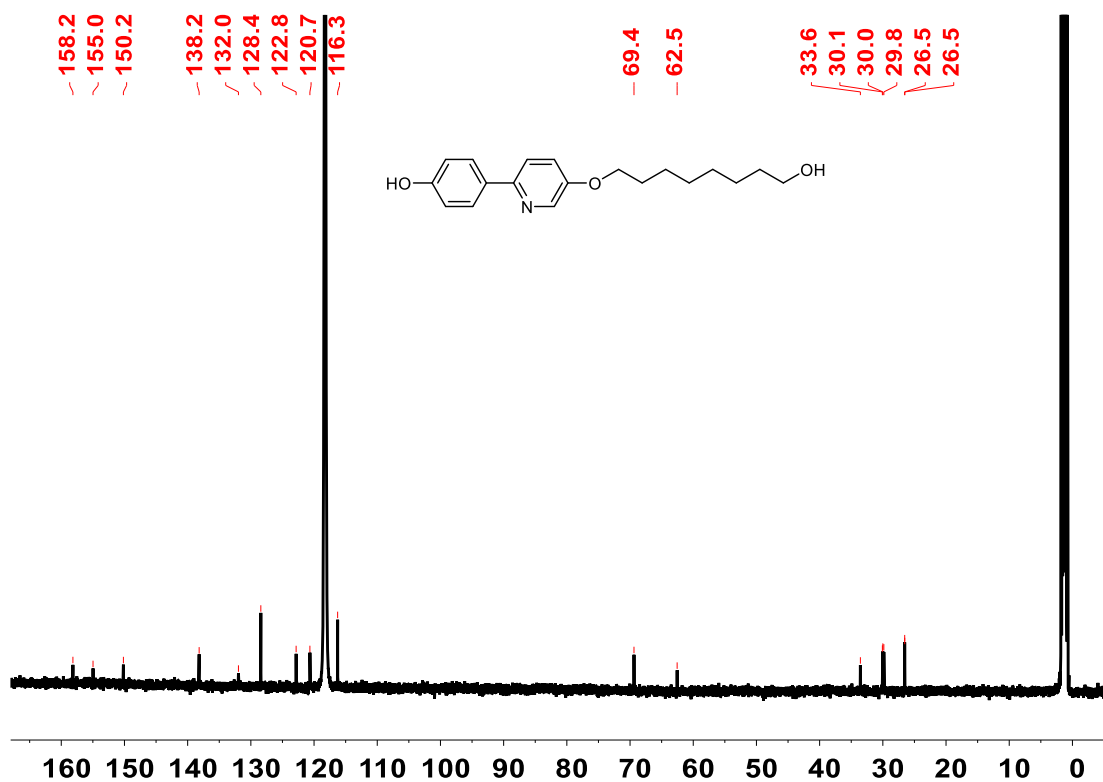

Fig. S6.  $^{13}\text{C}$  NMR spectrum (125 MHz,  $\text{CD}_3\text{CN}$ , 298 K) of compound 2.

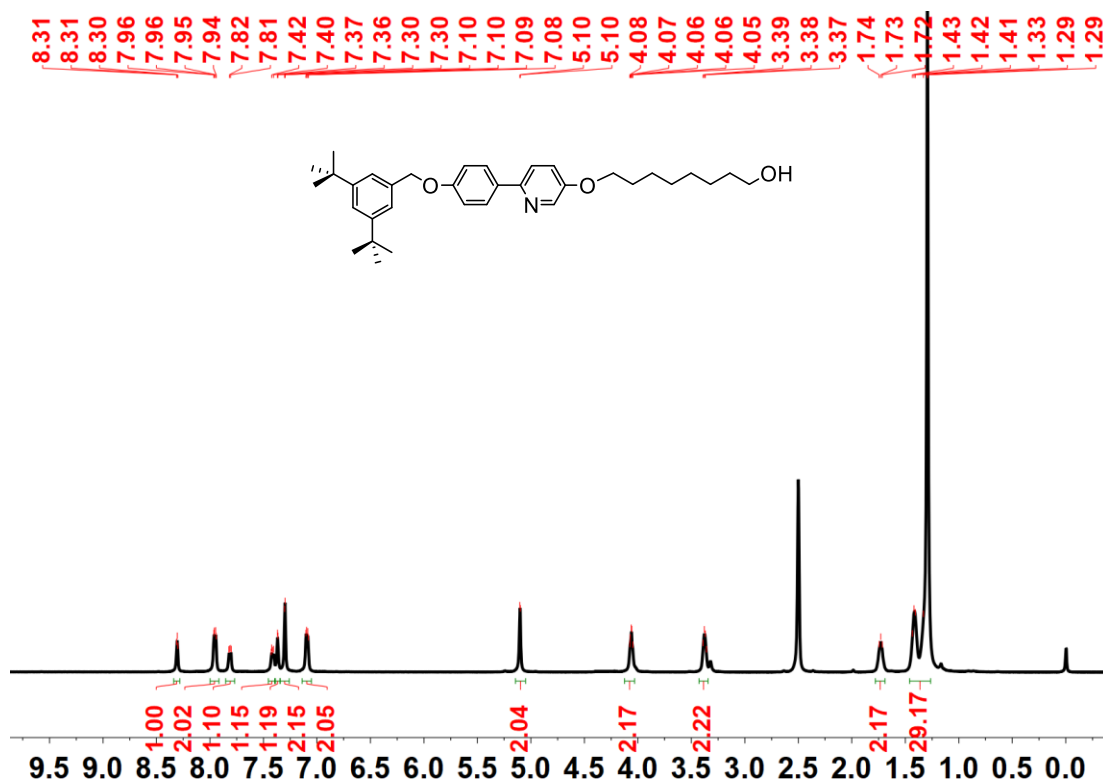

Fig. S7.  $^1\text{H}$  NMR spectrum (500 MHz,  $\text{CD}_3\text{CN}$ , 298 K) of compound G1.

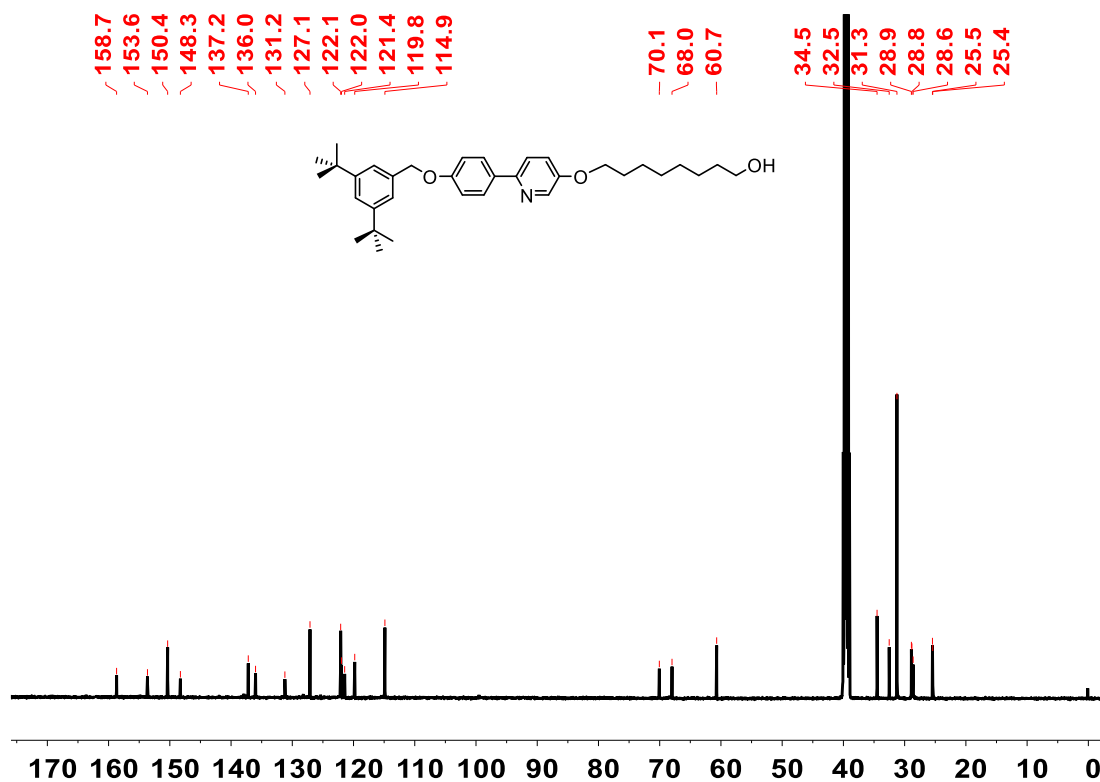

Fig. S8. <sup>13</sup>C NMR spectrum (125 MHz, CD<sub>3</sub>CN, 298 K) of compound G1.

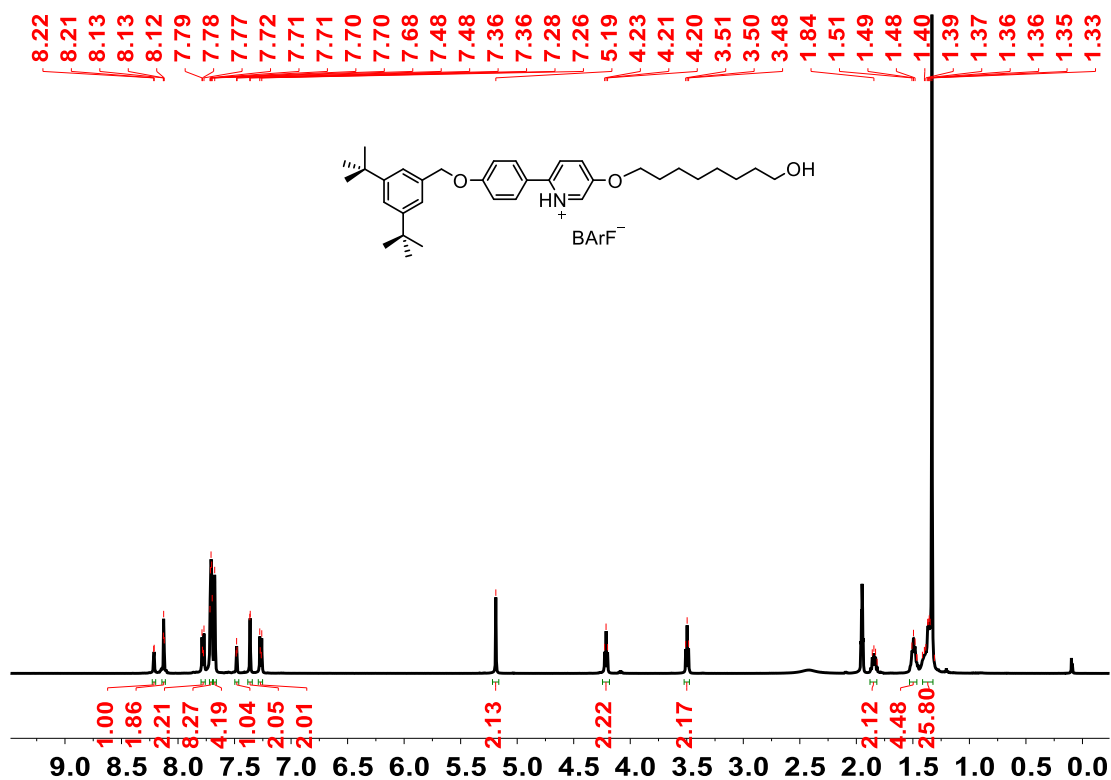

Fig. S9. <sup>1</sup>H NMR spectrum (500 MHz, CD<sub>3</sub>CN, 298 K) of compound G1-H.

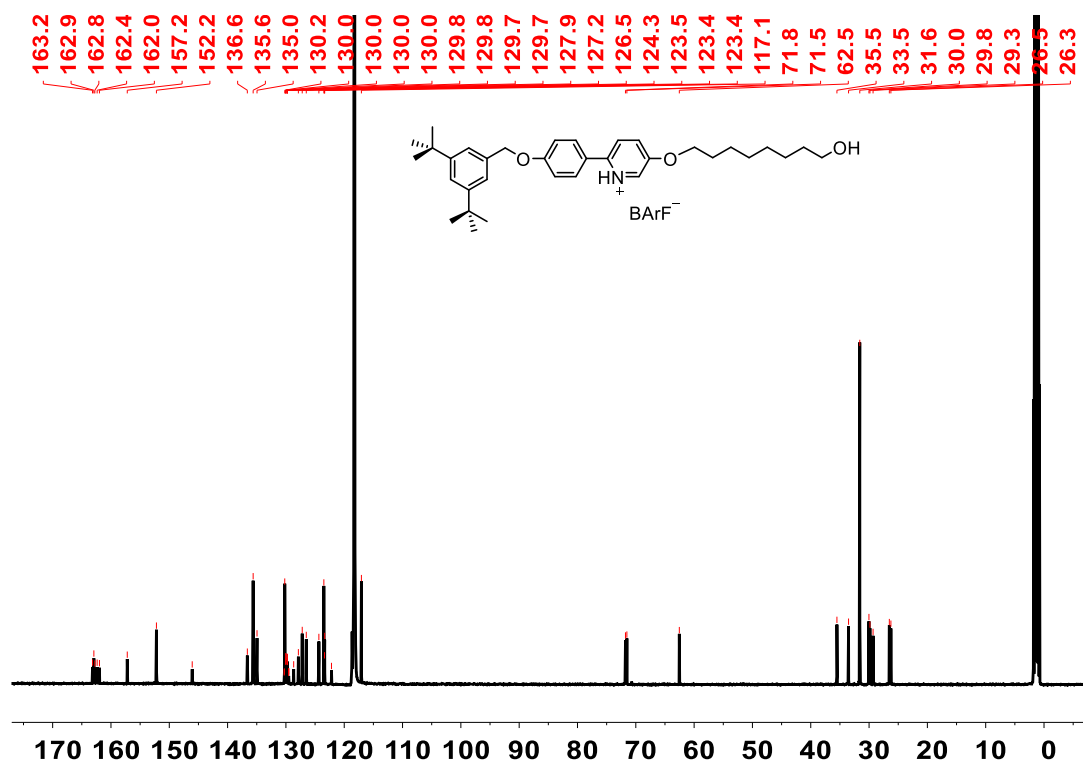

**Fig. S10.** <sup>13</sup>C NMR spectrum (125 MHz, CD<sub>3</sub>CN, 298 K) of compound **G1-H**.

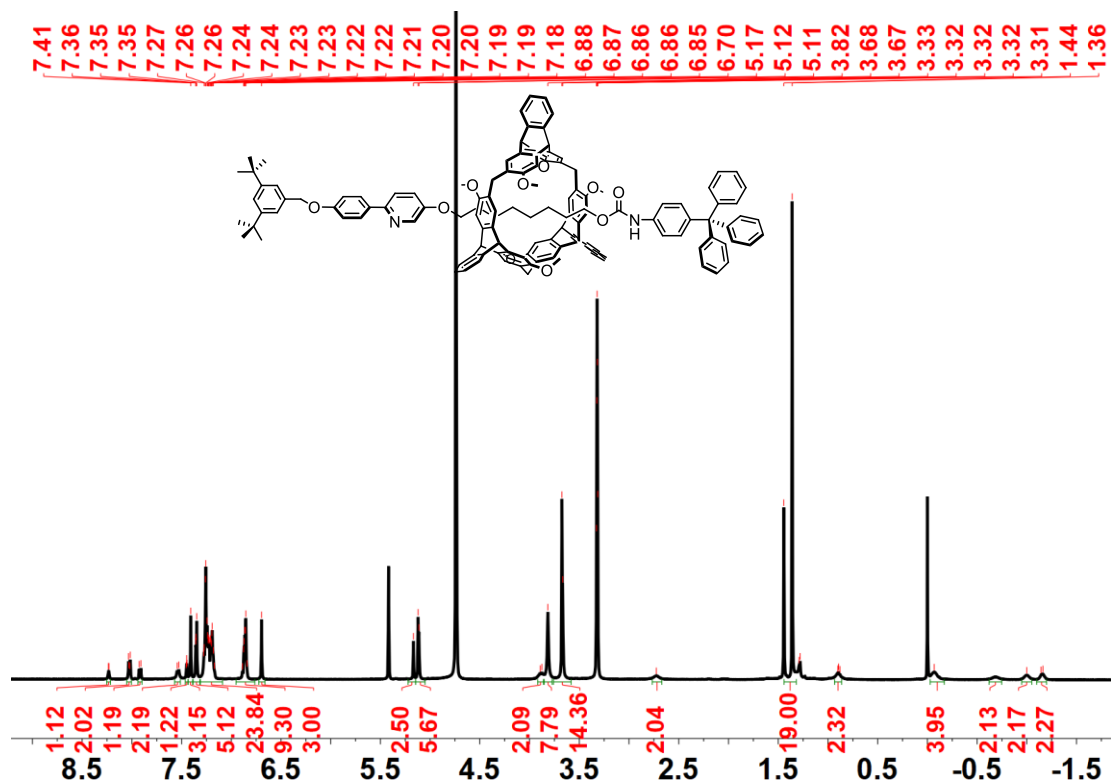

**Fig. S11.** <sup>1</sup>H NMR spectrum (500 MHz, CD<sub>3</sub>OD/CD<sub>2</sub>Cl<sub>2</sub> = 11:5 v/v, 298 K) of compound **R1**.

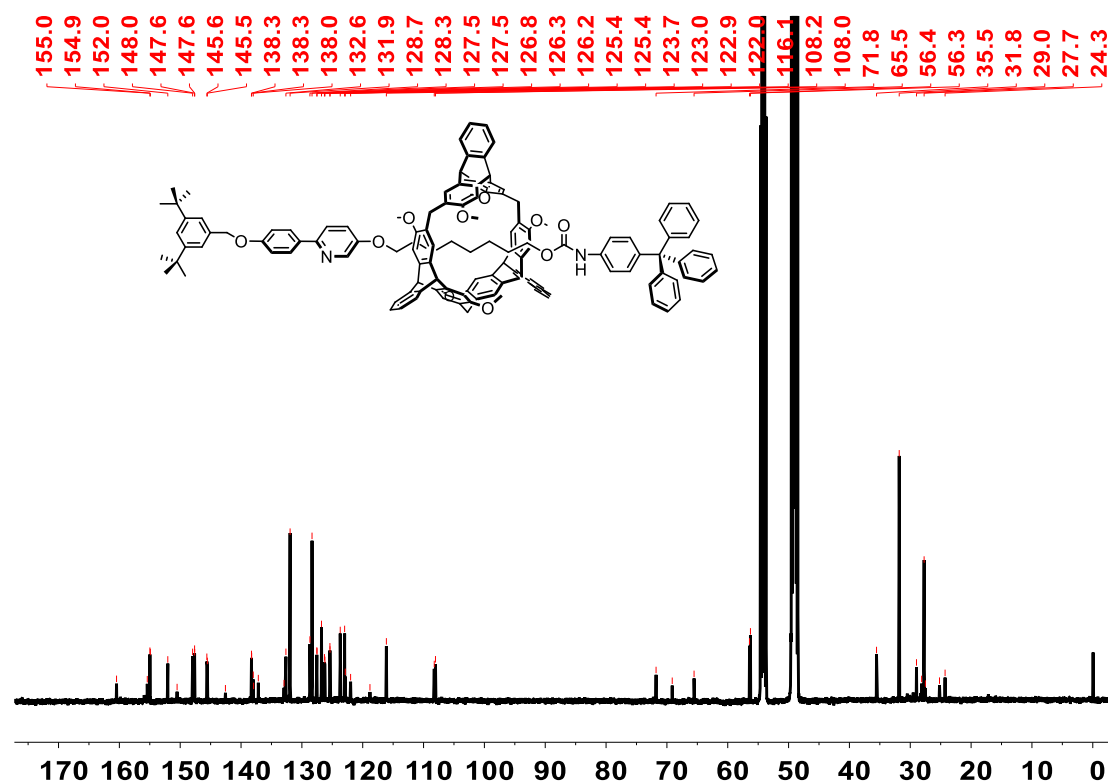

**Fig. S12.** <sup>13</sup>C NMR spectrum (125 MHz, CD<sub>3</sub>OD/CD<sub>2</sub>Cl<sub>2</sub> = 11:5 v/v, 298 K) of compound R1.

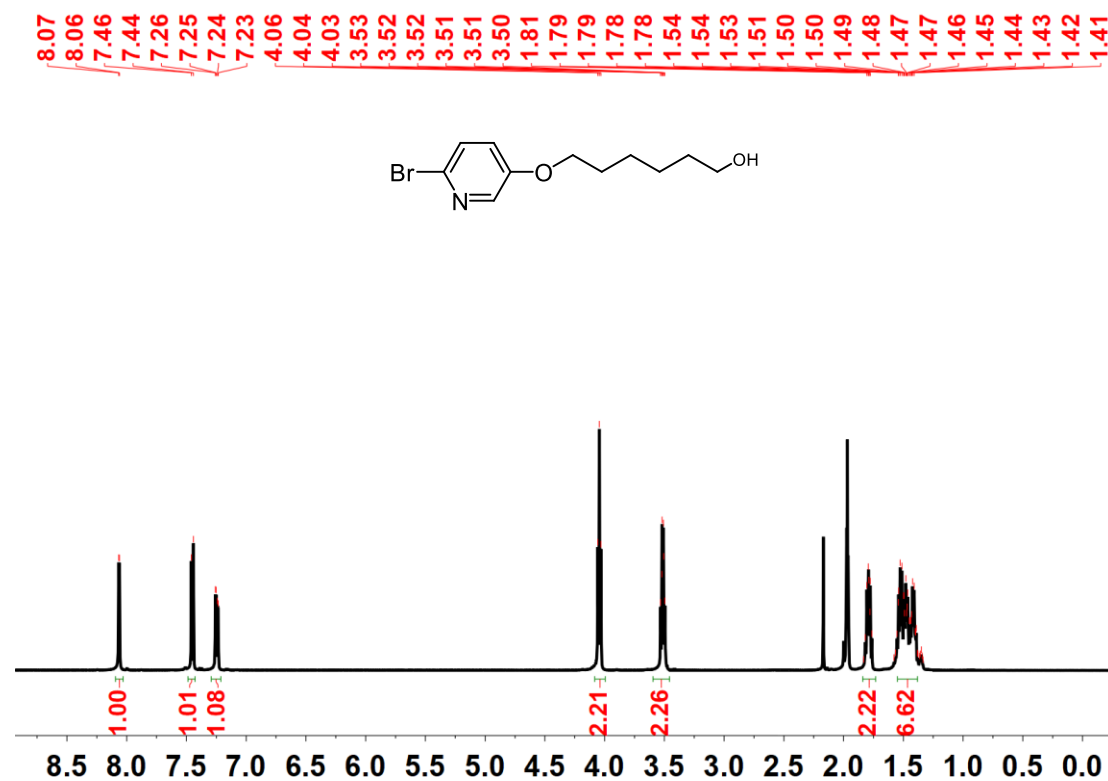

**Fig. S13.** <sup>1</sup>H NMR spectrum (500 MHz, CD<sub>3</sub>CN, 298 K) of compound 3.

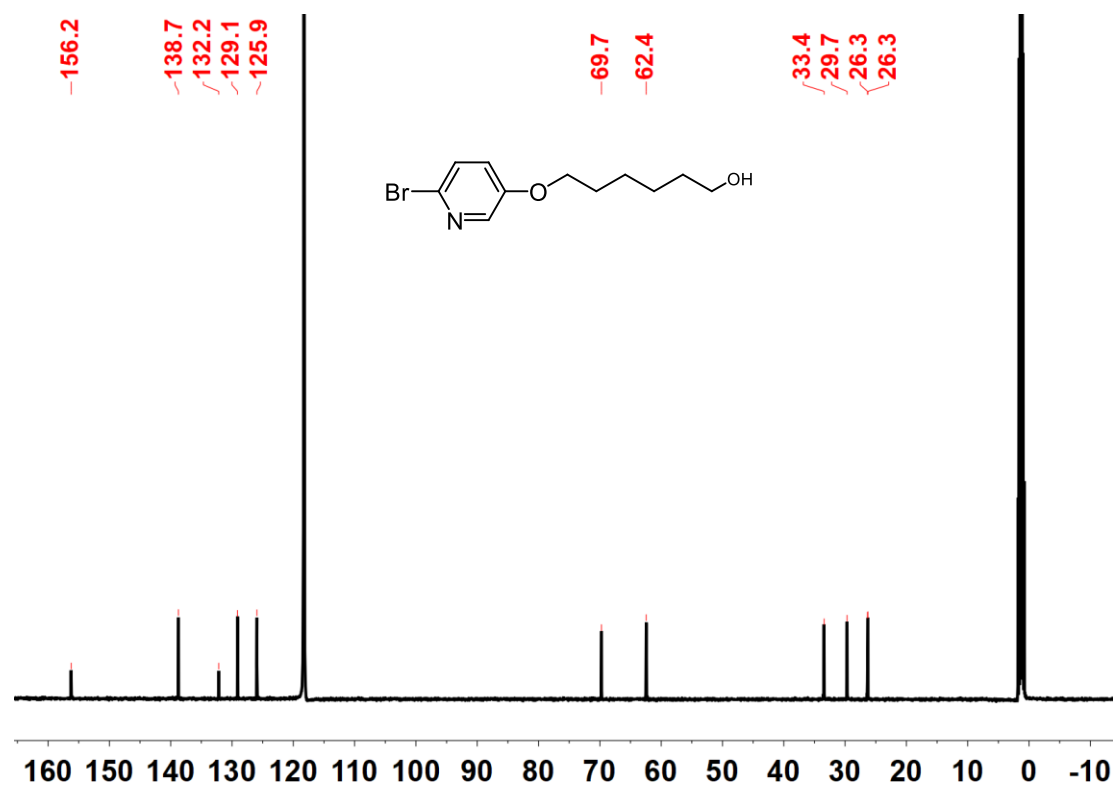

Fig. S14. <sup>13</sup>C NMR spectrum (125 MHz, CD<sub>3</sub>CN, 298 K) of compound 3.

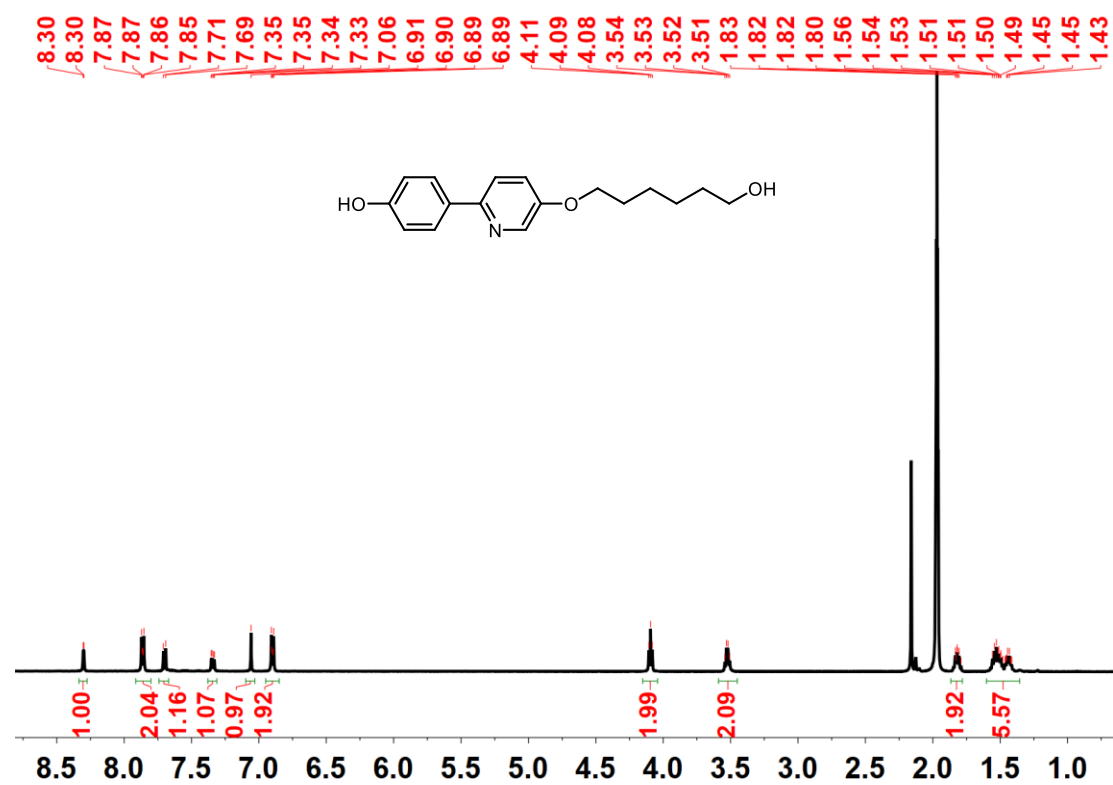

Fig. S15. <sup>1</sup>H NMR spectrum (500 MHz, CD<sub>3</sub>CN, 298 K) of compound 4.



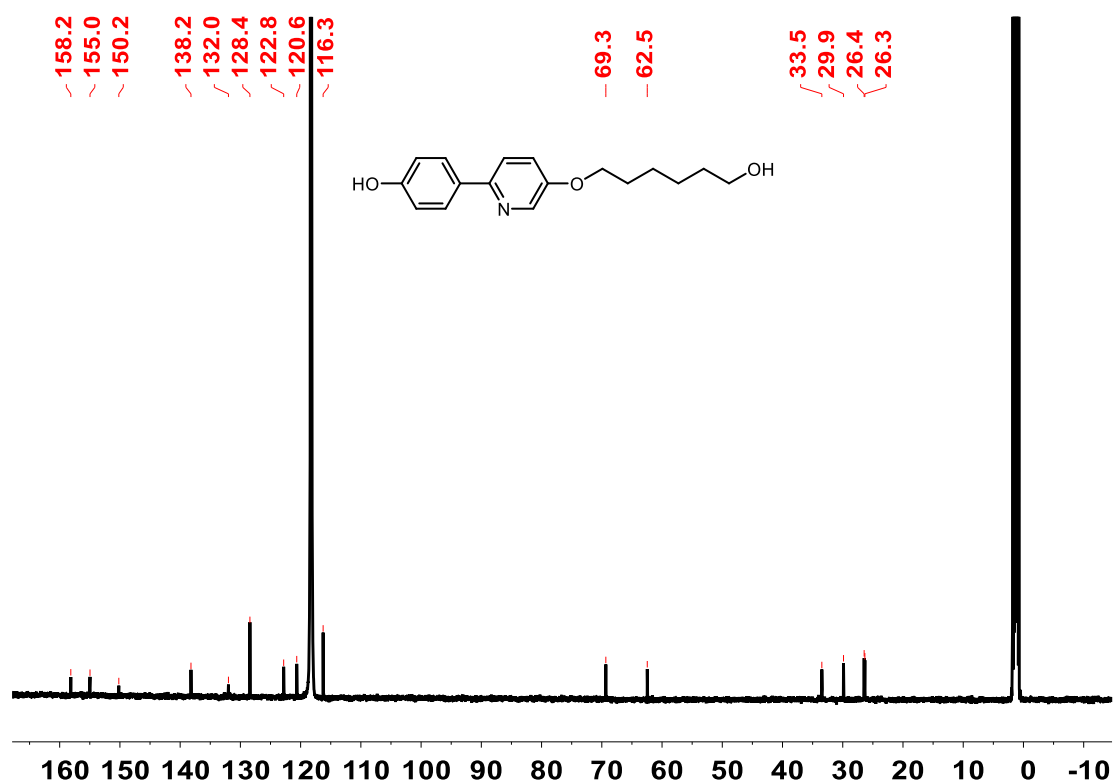

Fig. S16. <sup>13</sup>C NMR spectrum (125 MHz, CD<sub>3</sub>CN, 298 K) of compound 4.

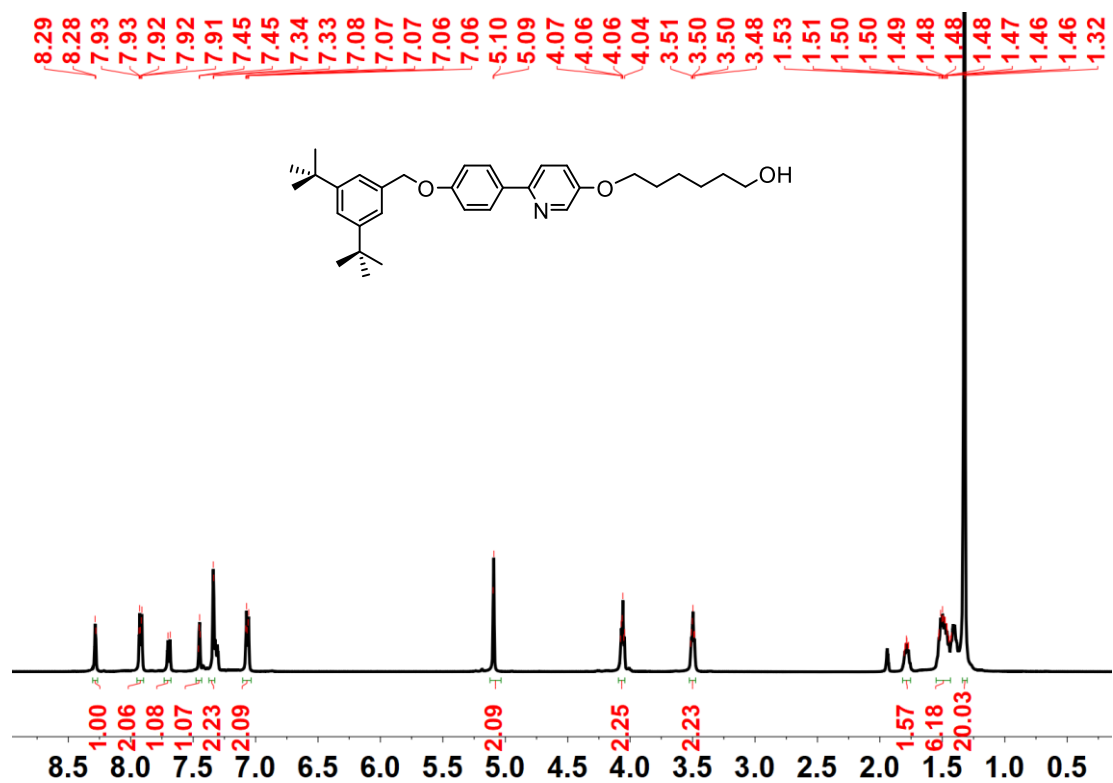

Fig. S17. <sup>1</sup>H NMR spectrum (500 MHz, CD<sub>3</sub>CN, 298 K) of compound G2.

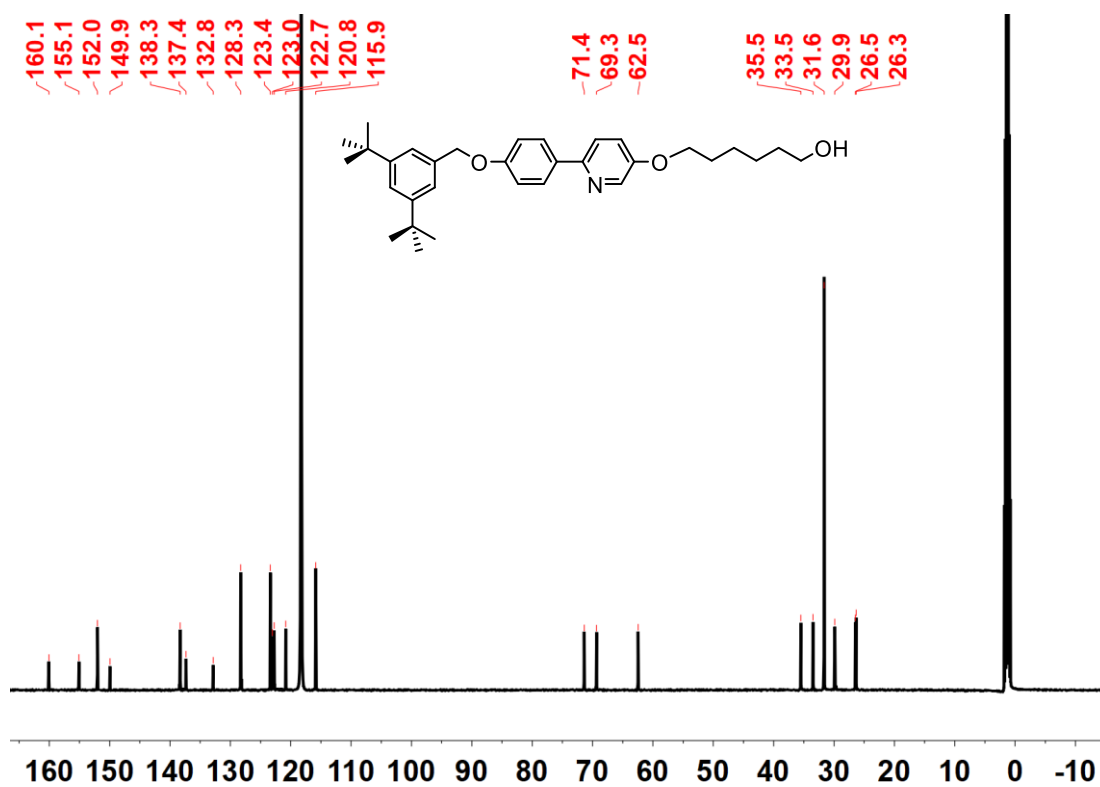

Fig. S18. <sup>13</sup>C NMR spectrum (125 MHz, CD<sub>3</sub>CN, 298 K) of compound G2.

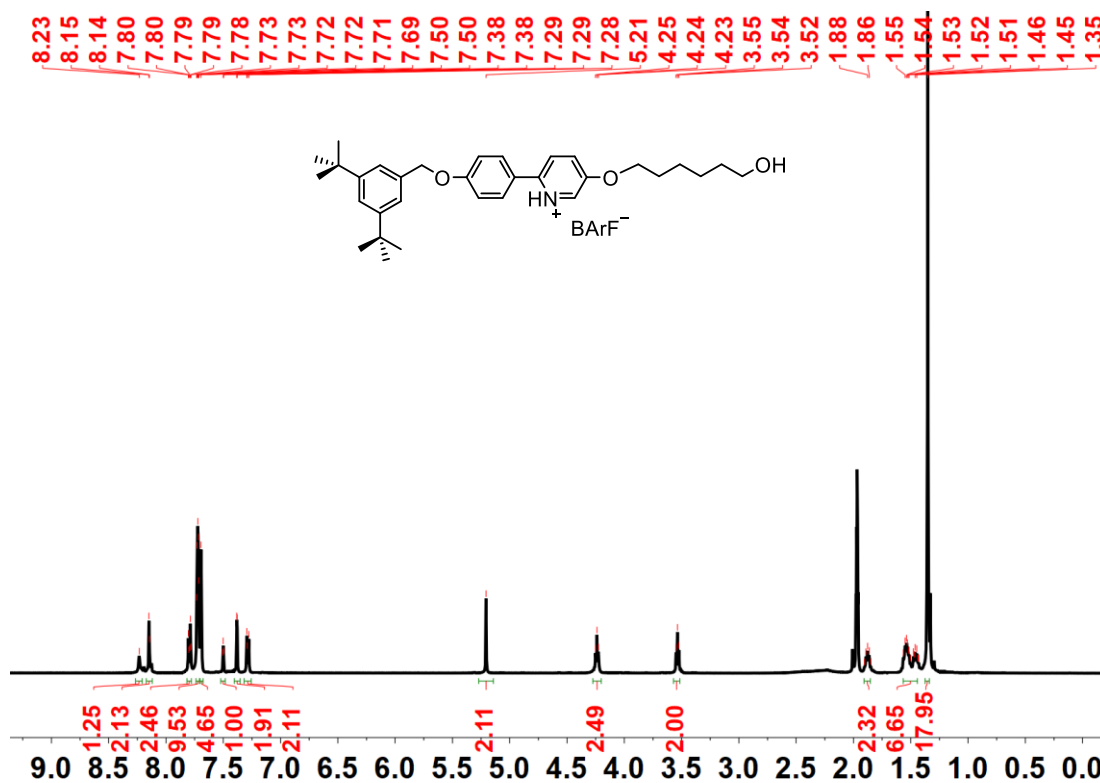

Fig. S19. <sup>1</sup>H NMR spectrum (500 MHz, CD<sub>3</sub>CN, 298 K) of compound G2-H.

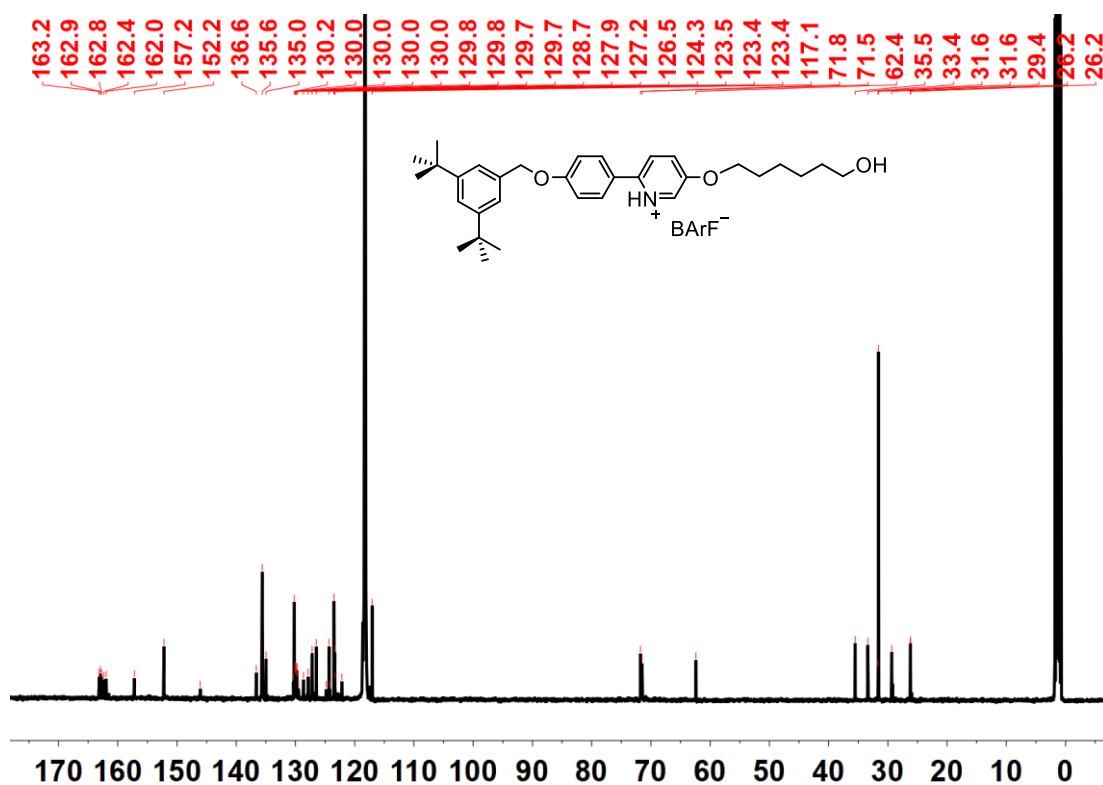

**Fig. S20.** <sup>13</sup>C NMR spectrum (125 MHz, CD<sub>3</sub>CN, 298 K) of compound **G2-H**.

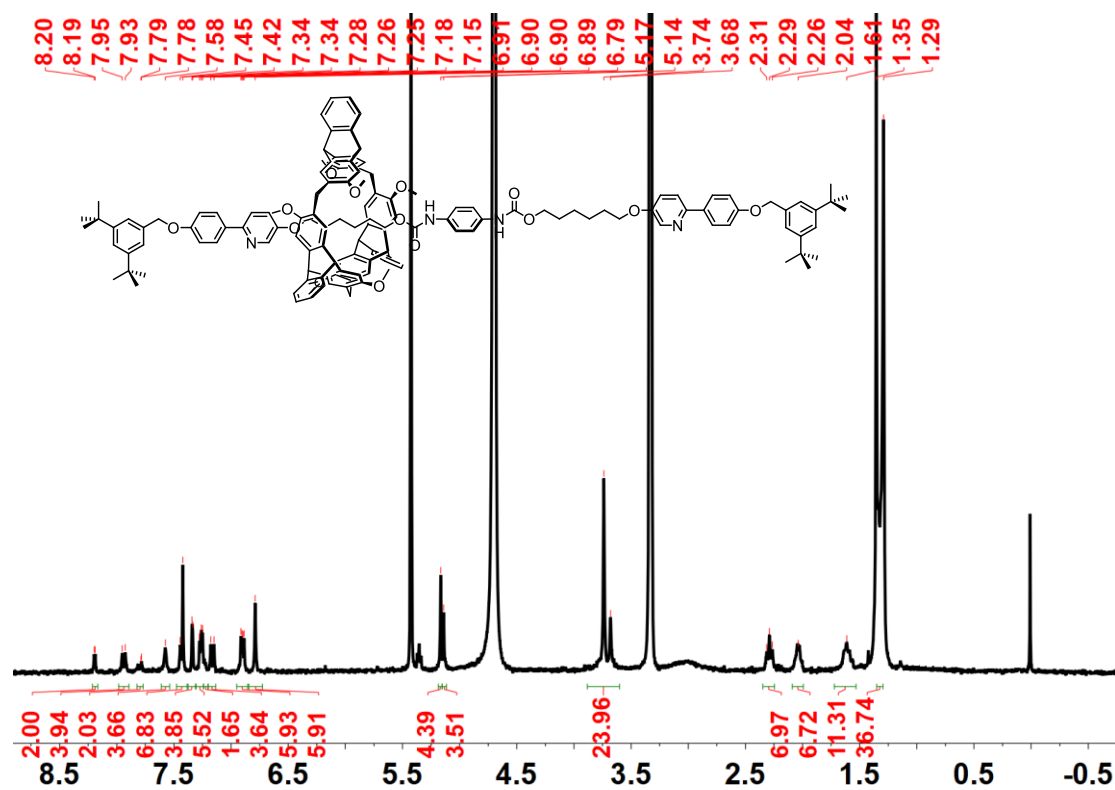

**Fig. S21.** <sup>1</sup>H NMR spectrum (500 MHz, CD<sub>3</sub>OD/CD<sub>2</sub>Cl<sub>2</sub> = 11:5 v/v, 298 K) of compound **R2**.

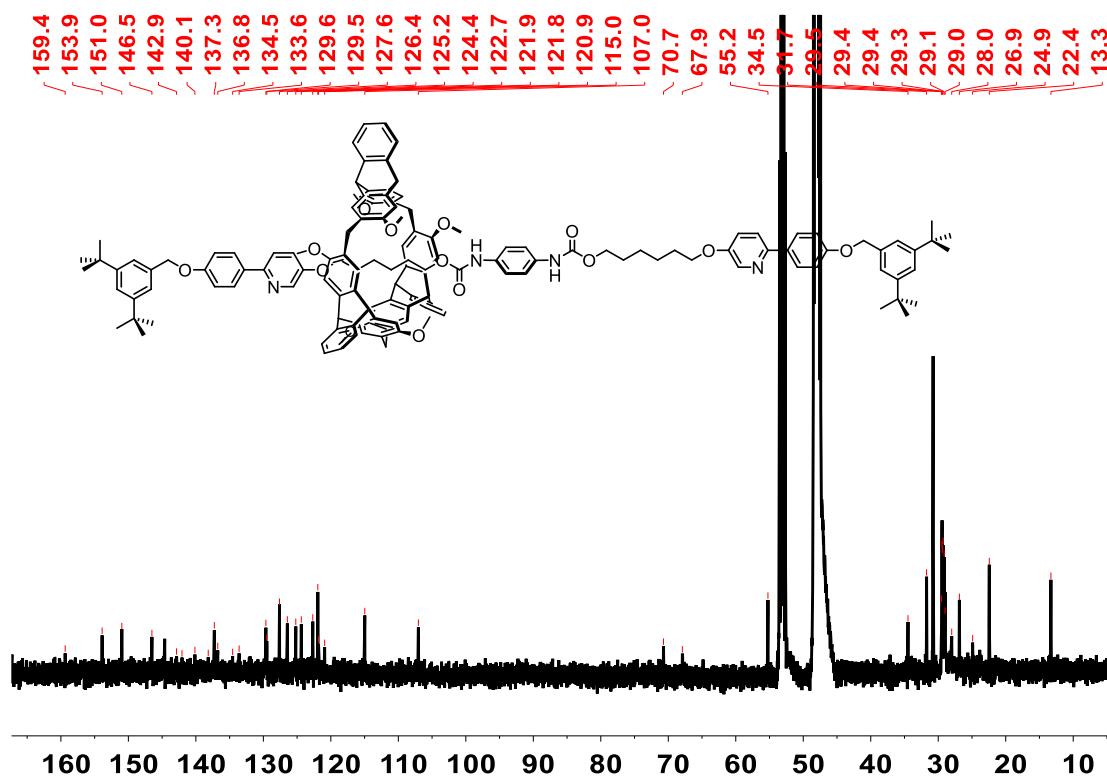

**Fig. S22.**  $^{13}\text{C}$  NMR spectrum (125 MHz,  $\text{CD}_3\text{OD}/\text{CD}_2\text{Cl}_2 = 11:5$  v/v, 298 K) of compound **R2**.

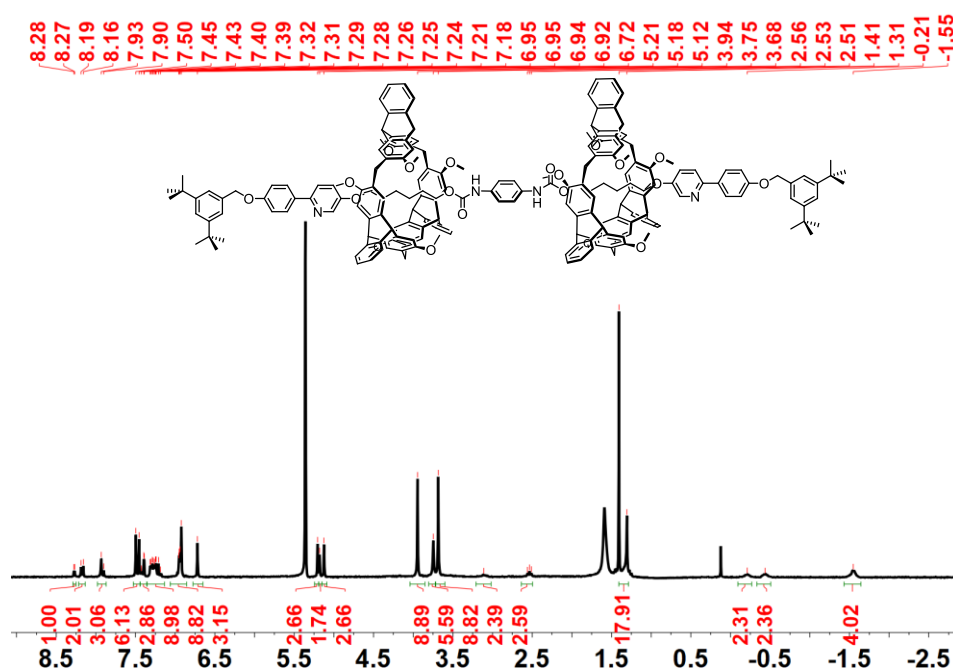

**Fig. S23.**  $^1\text{H}$  NMR spectrum (300 MHz,  $\text{CD}_2\text{Cl}_2$ , 298 K) of compound **R3**.

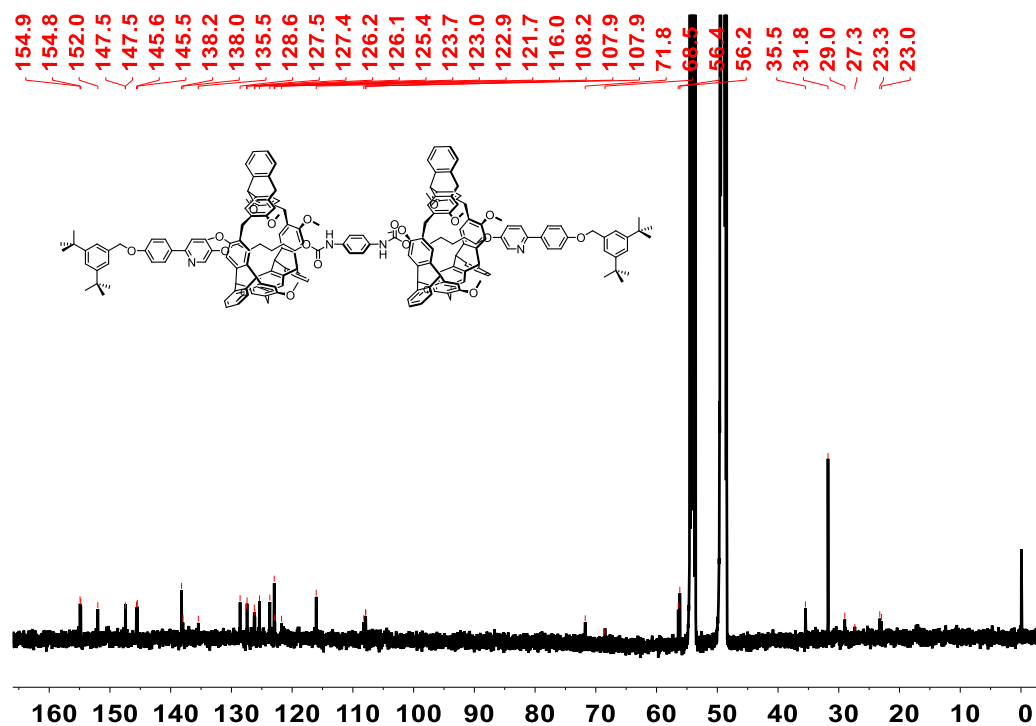

**Fig. S24.**  $^{13}\text{C}$  NMR spectrum (125 MHz,  $\text{CD}_3\text{OD}/\text{CD}_2\text{Cl}_2 = 11:5$  v/v, 298 K) of compound **R3**.

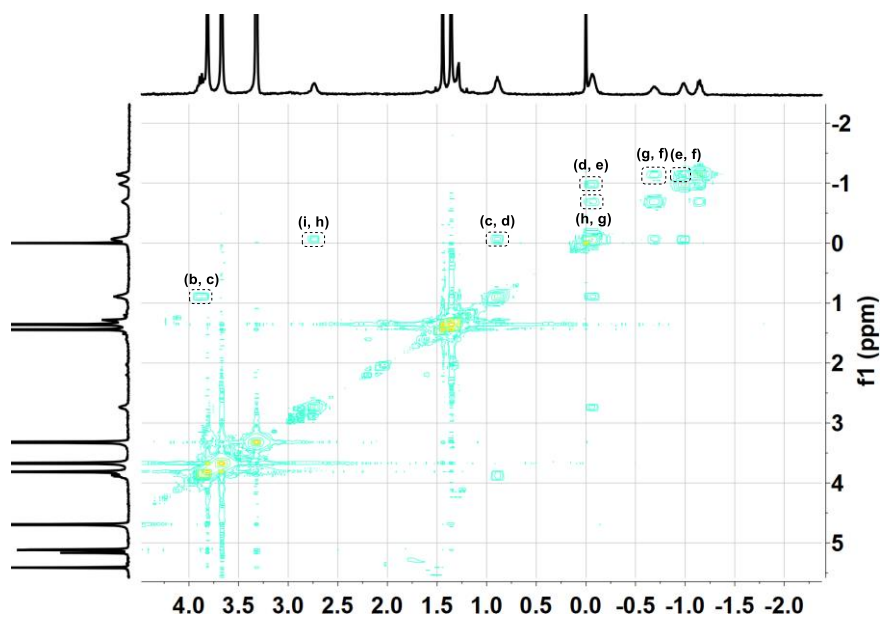

**Fig. S25.** 2D COSY spectrum (500 MHz,  $\text{CD}_3\text{OD}/\text{CD}_2\text{Cl}_2 = 11:5$  v/v, 298 K) of **R1**.

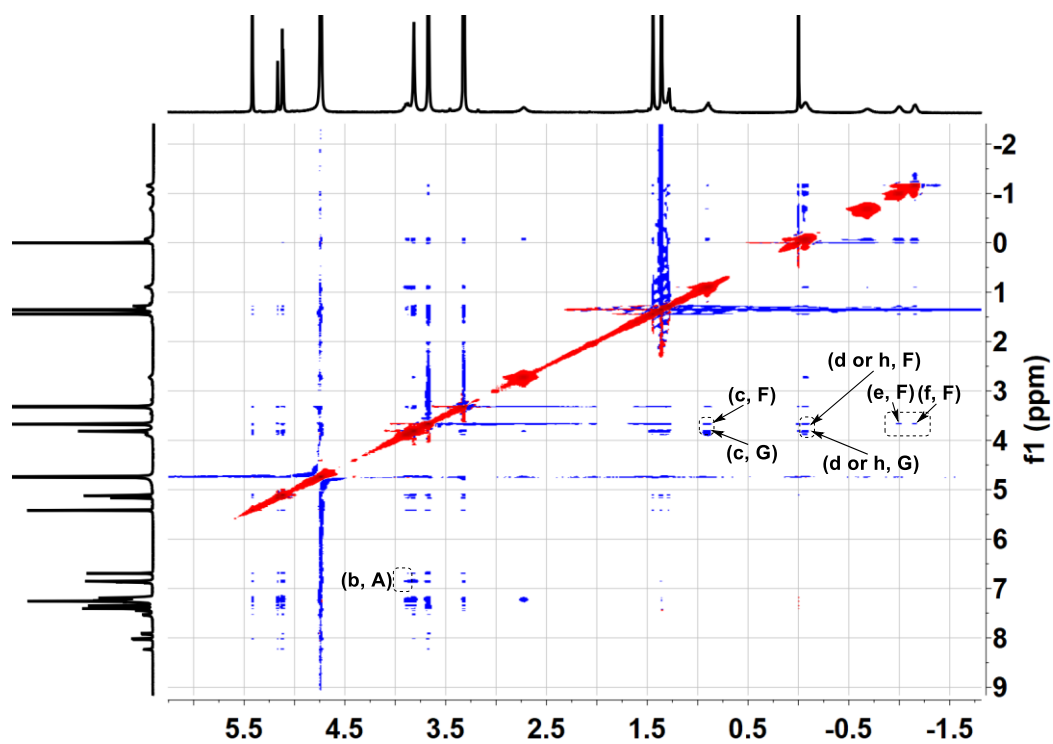

**Fig. S26.** 2D ROESY spectrum (500 MHz,  $\text{CD}_3\text{OD}/\text{CD}_2\text{Cl}_2 = 11:5$  v/v, 298 K) of **R1**.

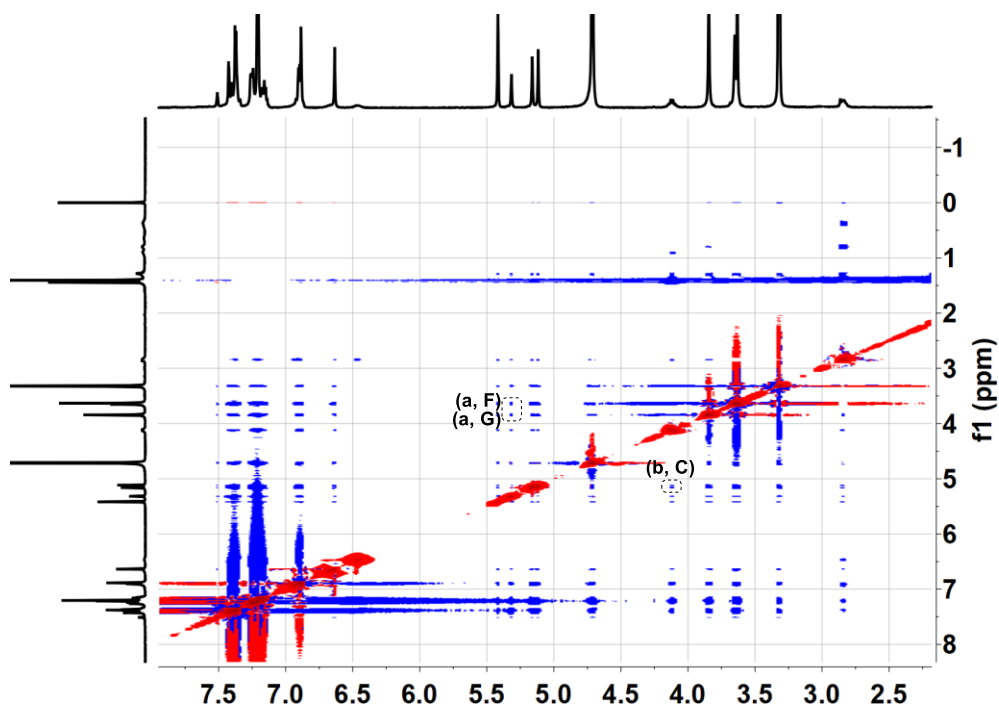

**Fig. S27.** 2D NOESY spectrum (500 MHz,  $\text{CD}_3\text{OD}/\text{CD}_2\text{Cl}_2 = 11:5$  v/v, 298 K) of **R1-**

**H.**

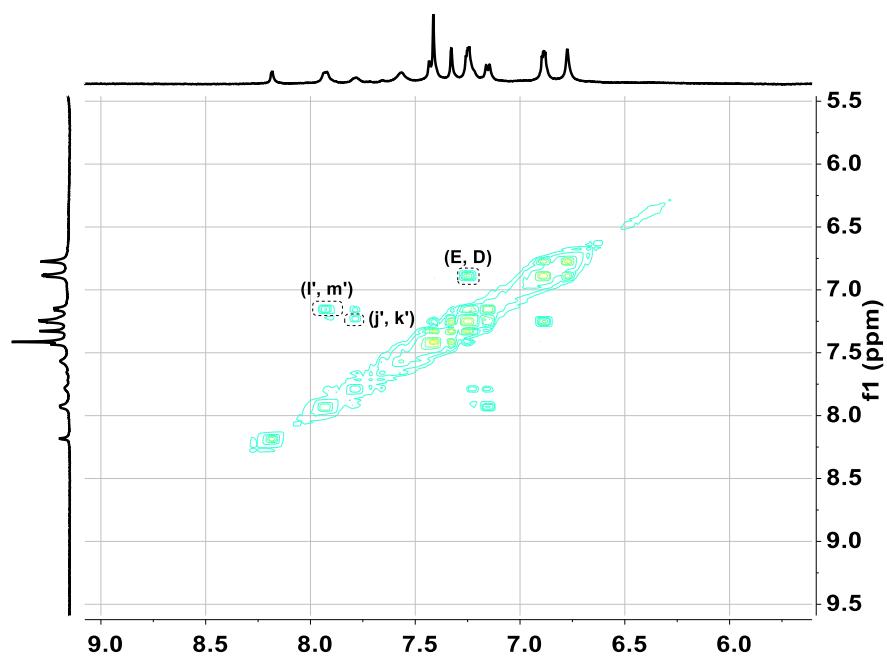

**Fig. S28.** 2D COSY spectrum (500 MHz,  $\text{CD}_3\text{OD}/\text{CD}_2\text{Cl}_2 = 11:5$  v/v, 298 K) of **R2**.

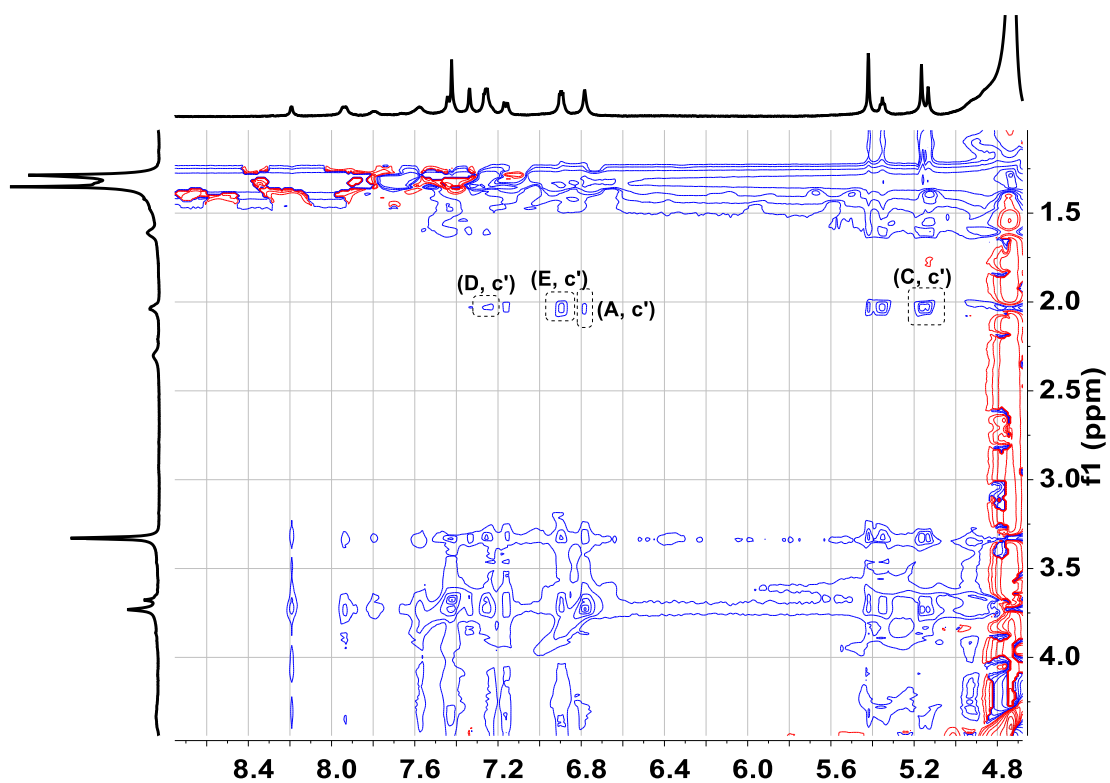

**Fig. S29.** 2D ROESY spectrum (500 MHz,  $\text{CD}_3\text{OD}/\text{CD}_2\text{Cl}_2 = 11:5$  v/v, 298 K) of **R2**.

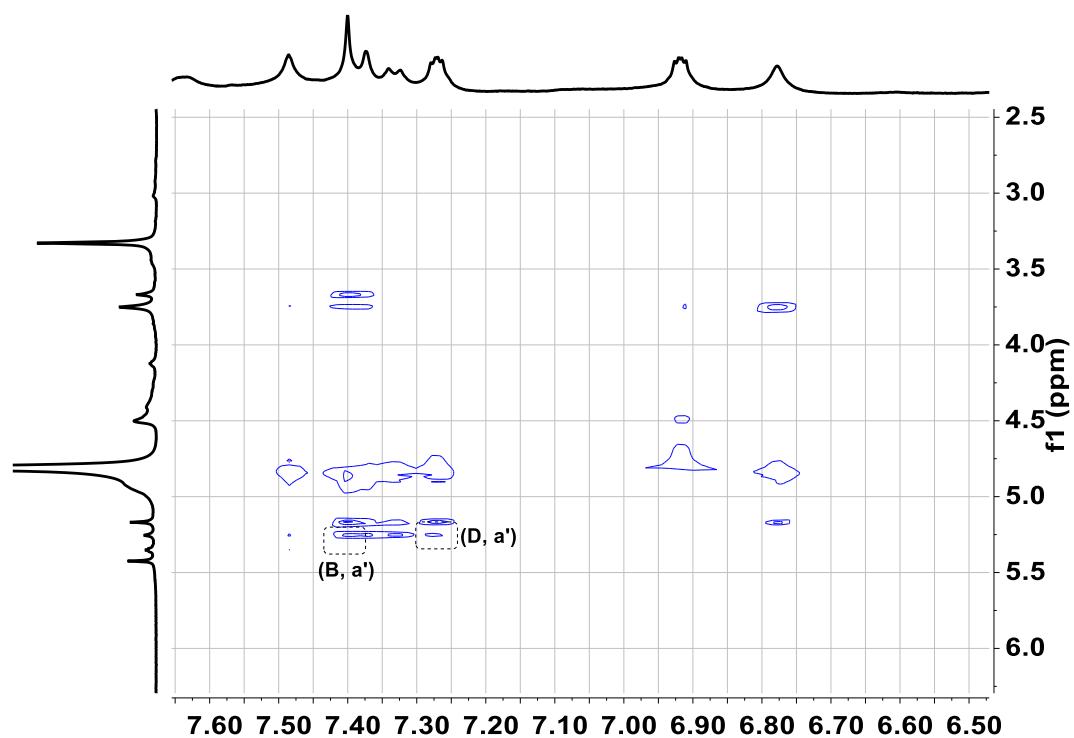

**Fig. S30.** 2D NOESY spectrum (500 MHz,  $\text{CD}_3\text{OD}/\text{CD}_2\text{Cl}_2 = 11:5$  v/v, 298 K) of **R2-H**.

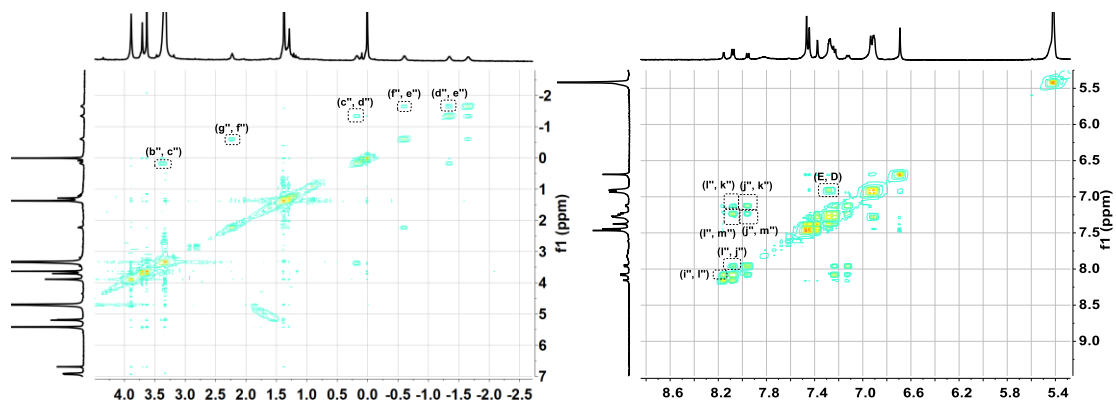

**Fig. S31.** 2D COSY spectrum (500 MHz,  $\text{CD}_3\text{OD}/\text{CD}_2\text{Cl}_2 = 11:5$  v/v, 298 K) of **R3**.



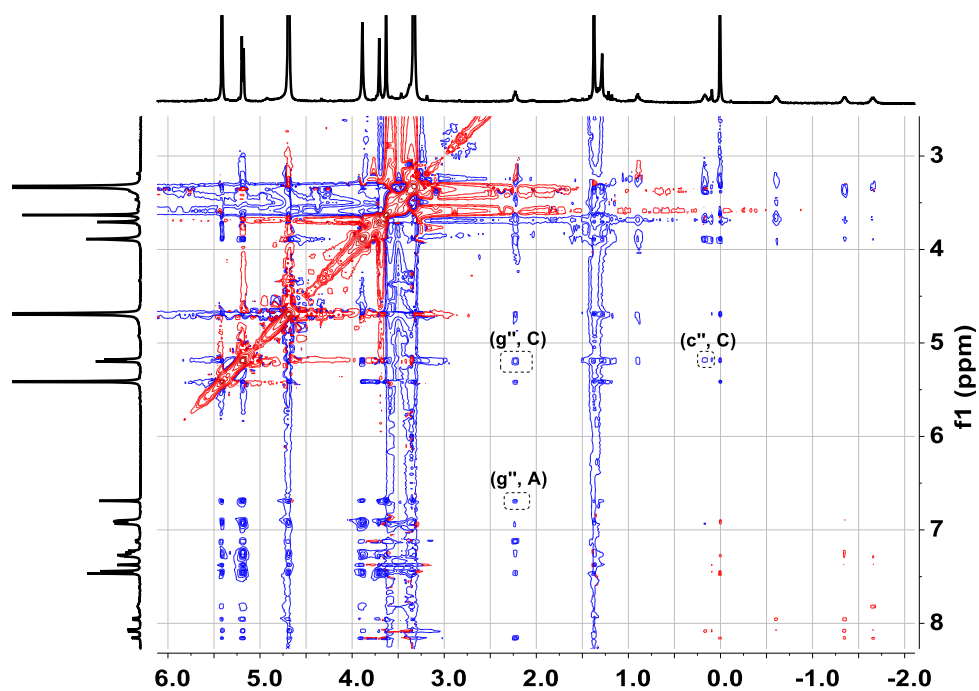

Fig. S32. 2D ROESY spectrum (500 MHz,  $\text{CD}_3\text{OD}/\text{CD}_2\text{Cl}_2 = 11:5$  v/v, 298 K) of **R3**.

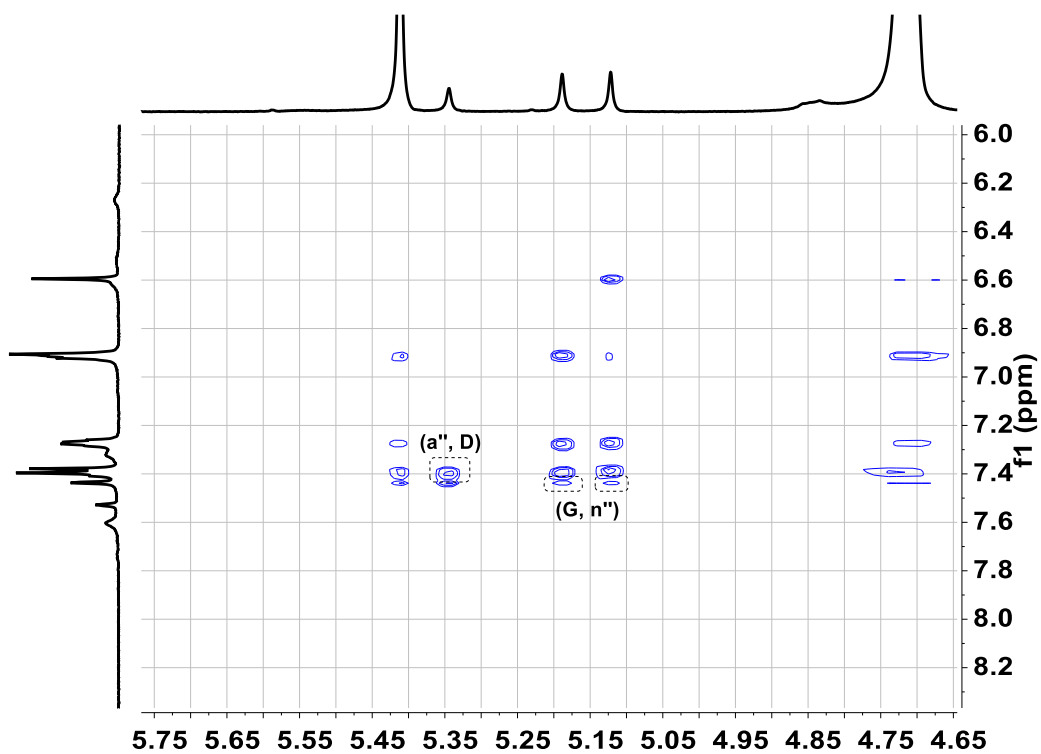

Fig. S33. 2D ROESY spectrum (500 MHz,  $\text{CD}_3\text{OD}/\text{CD}_2\text{Cl}_2 = 11:5$  v/v, 298 K) of **R3-H**.

## 6. Variable-temperature $^1\text{H}$ NMR experiments

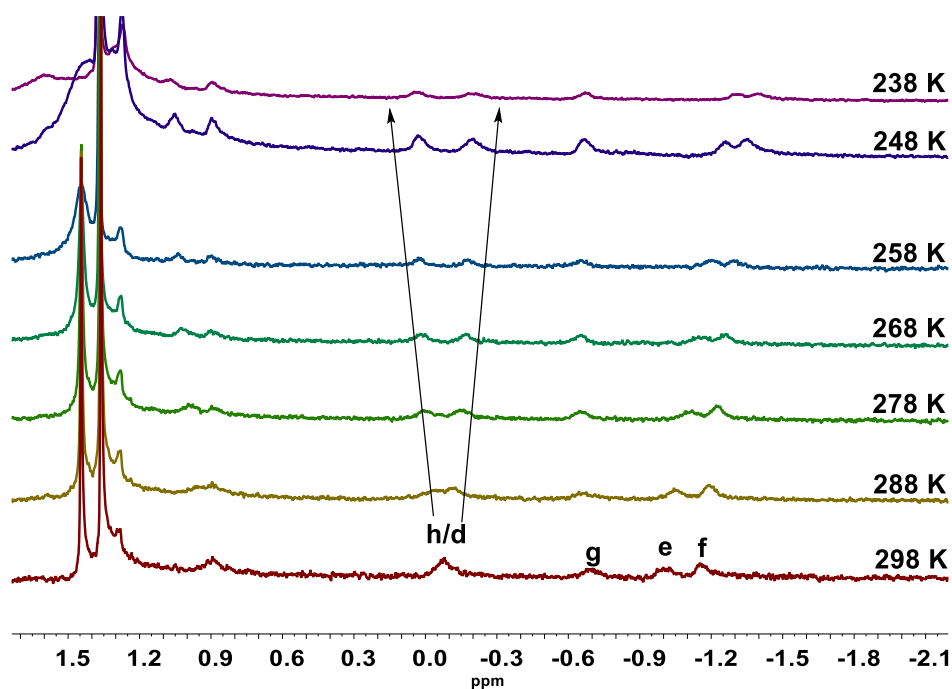

**Fig. S34.** Variable-temperature  $^1\text{H}$  NMR experiments of **R1** (500 MHz,  $\text{CD}_3\text{OD}/\text{CD}_2\text{Cl}_2$  = 11:5 v/v).

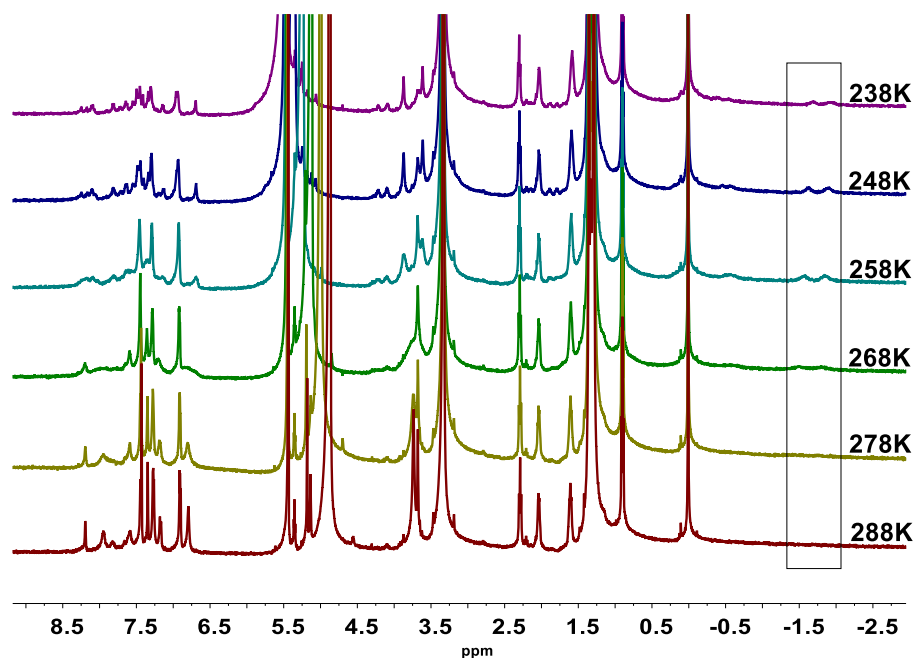

**Fig. S35.** Variable-temperature  $^1\text{H}$  NMR experiments of **R2** (500 MHz,  $\text{CD}_3\text{OD}/\text{CD}_2\text{Cl}_2$  = 11:5 v/v).

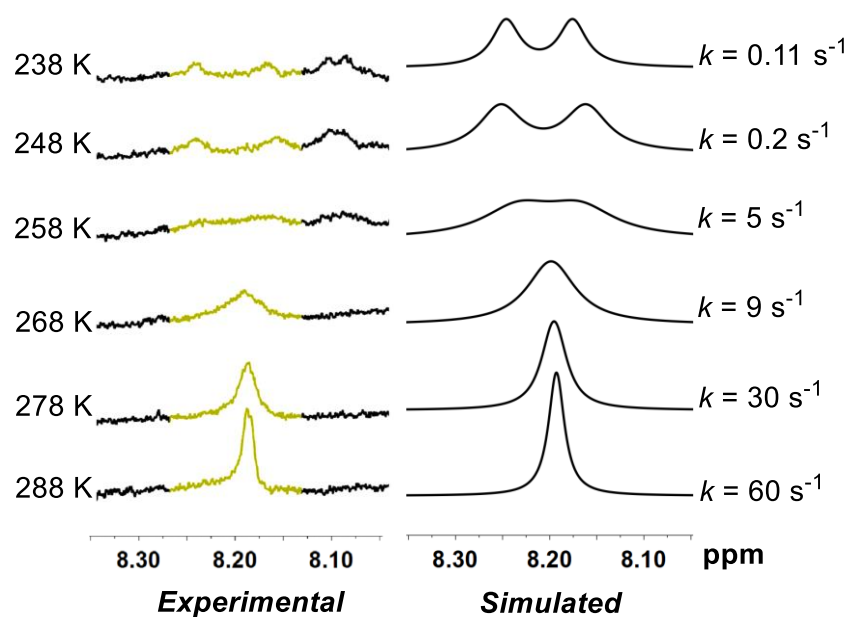

**Fig. S36.** Experimentally measured (left) and simulated (right) variable-temperature  $^1\text{H}$  NMR (500 MHz,  $\text{CD}_3\text{OD}/\text{CD}_2\text{Cl}_2 = 11:5$  v/v) spectra of  $\text{H}^{\text{i}}$  of **R2**.

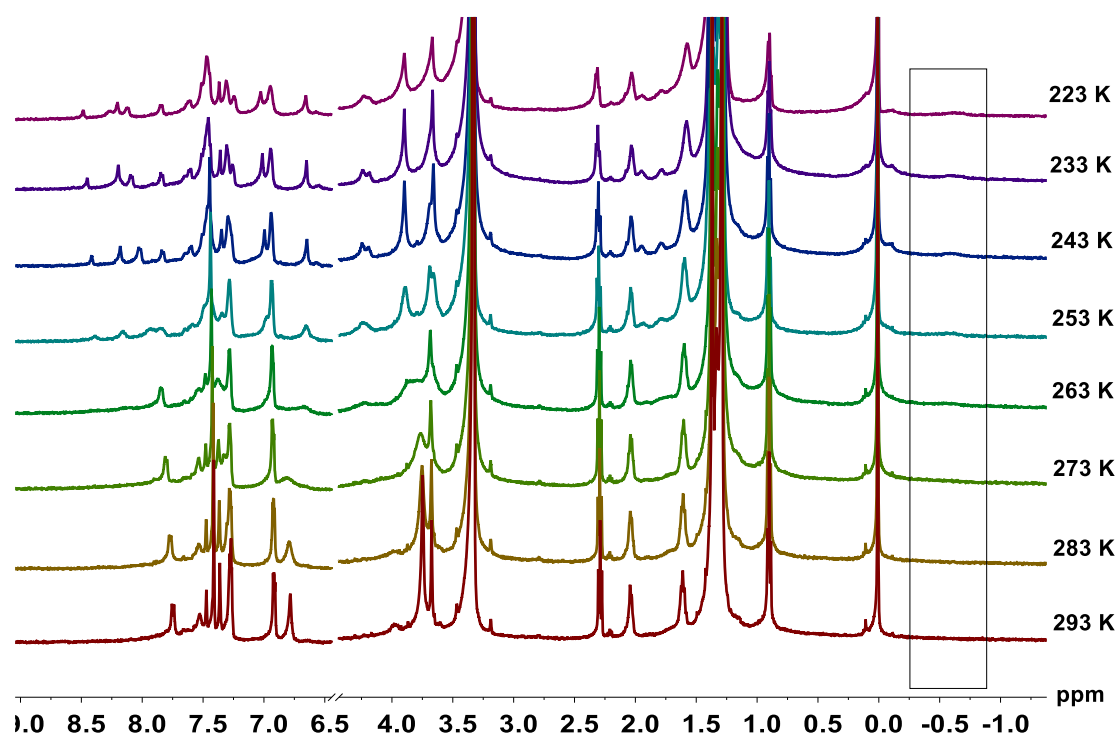

**Fig. S37.** Variable-temperature  $^1\text{H}$  NMR experiments of **R2-H** (500 MHz,  $\text{CD}_3\text{OD}/\text{CD}_2\text{Cl}_2 = 11:5$  v/v).

## 7. CD spectra of chiral rotaxanes

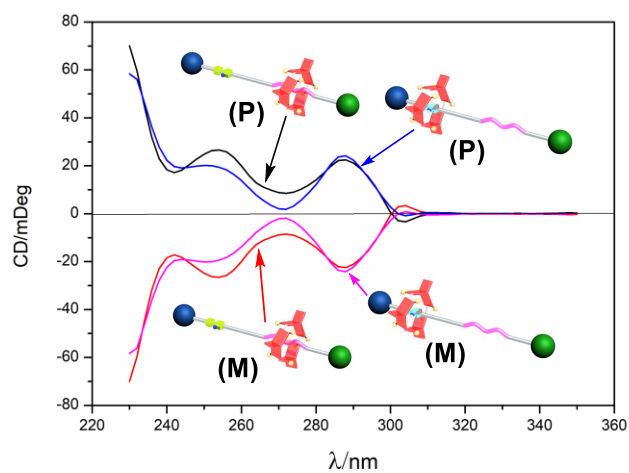

**Fig. S38.** Comparison of CD spectra of *P*- or *M*-R1 and *P*- or *M*-R1-H.

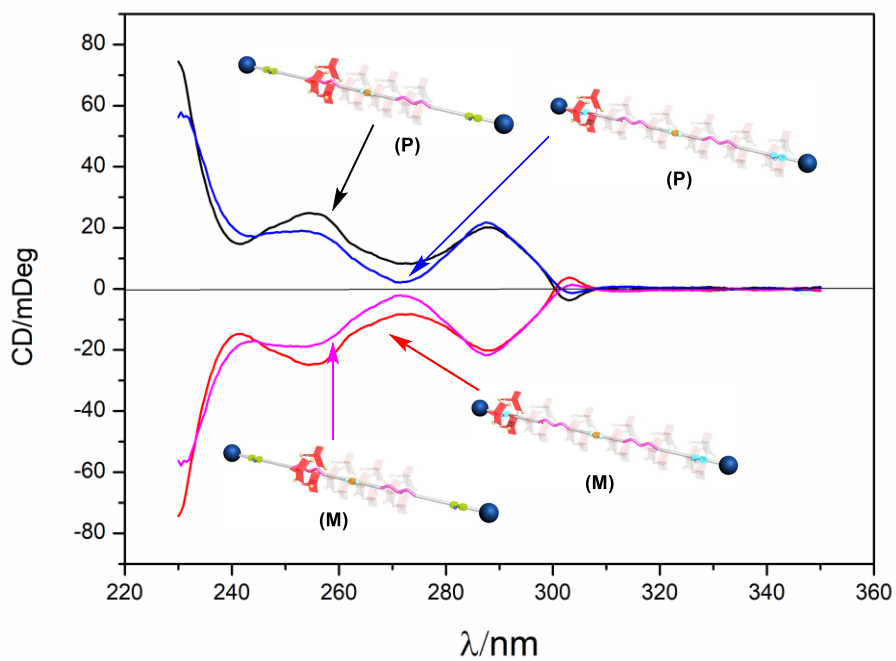

**Fig. S39.** Comparison of CD spectra of *P*- or *M*-R2 and *P*- or *M*-R2-H.

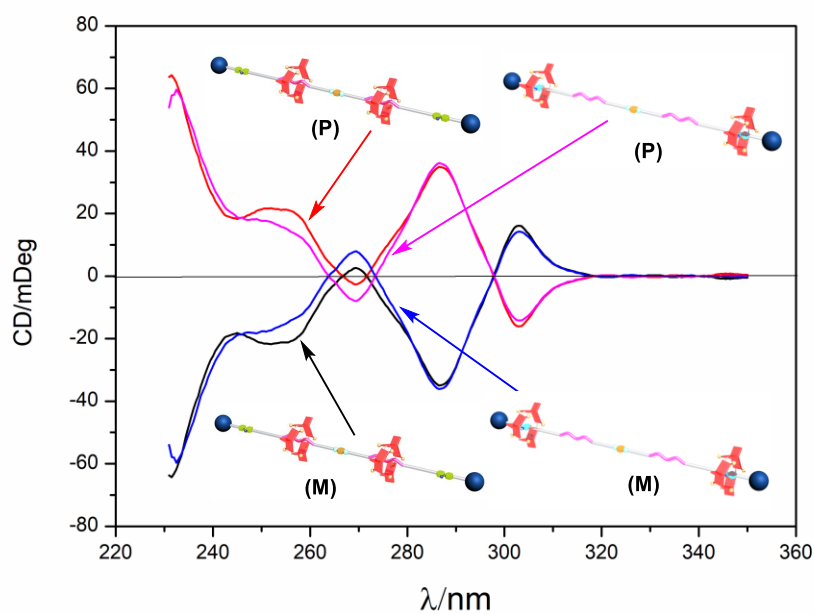

**Fig. S40.** Comparison of CD spectra of *P*- or *M*-**R3** and *P*- or *M*-**R3-H**.

## 8. Acid-base controlled motion

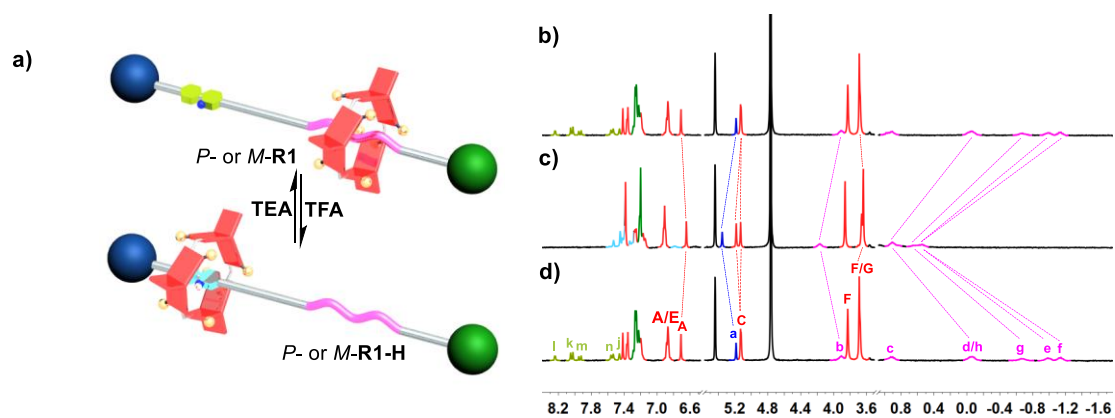

**Fig. S41** Acid-base driven motion of (a) *P*- or *M*-**R1** and partial  $^1\text{H}$  NMR spectra ( $\text{CD}_3\text{OD}/\text{CD}_2\text{Cl}_2 = 11:5$  v/v, 298 K, 300 MHz) of d) *P*- or *M*-**R1**, c) *P*- or *M*-**R1** + 1.2 equiv TFA, b) *P*- or *M*-**R1** + 1.2 equiv TFA + 1.5 equiv TEA.

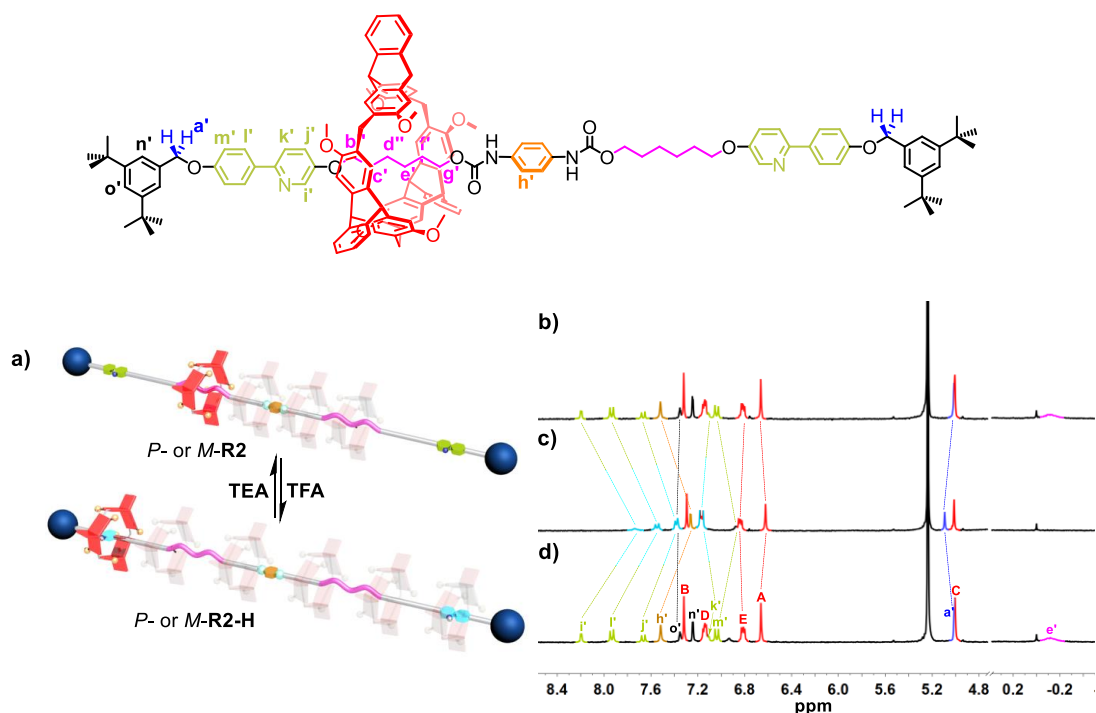

**Fig. S42** Acid-base driven motion of (a) *P*- or *M*-R2 and partial <sup>1</sup>H NMR spectra (CD<sub>3</sub>OD/CD<sub>2</sub>Cl<sub>2</sub> = 11:5 v/v, 298 K, 300 MHz) of d) *P*- or *M*-R2, c) *P*- or *M*-R2 + 5.0 equiv TFA, b) *P*- or *M*-R2 + 5.0 equiv TFA + 5.5 equiv TEA.

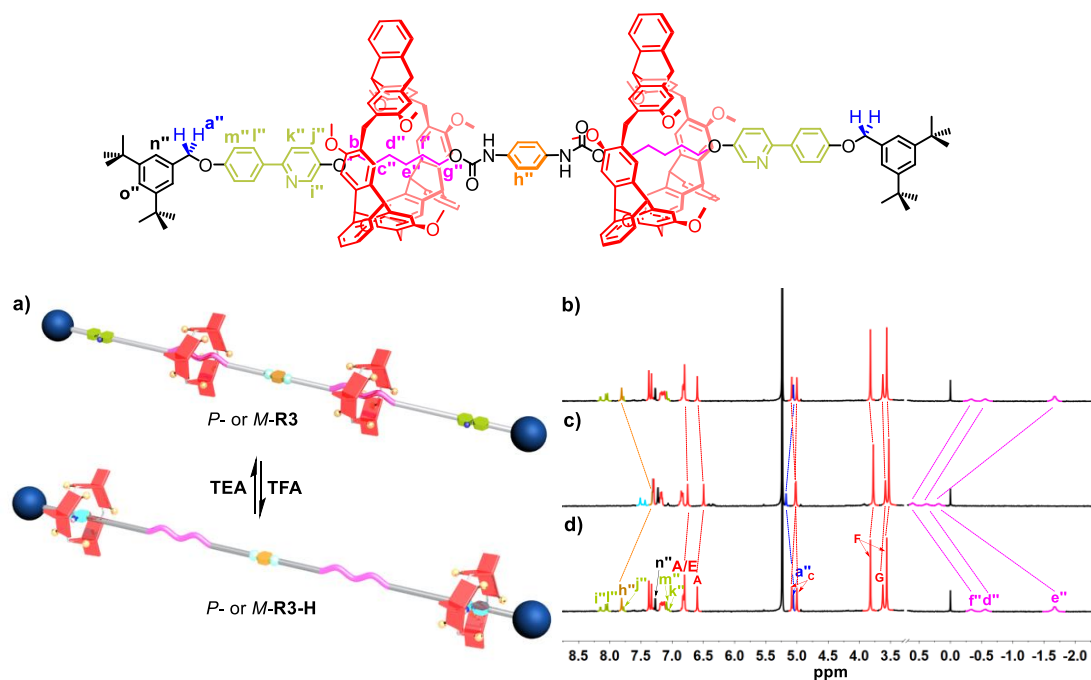

**Fig. S43** Acid-base driven motion of (a) *P*- or *M*-R3 and partial <sup>1</sup>H NMR spectra (CD<sub>3</sub>OD/CD<sub>2</sub>Cl<sub>2</sub> = 11:5 v/v, 298 K, 300 MHz) of d) *P*- or *M*-R3, c) *P*- or *M*-R3 + 5.0 equiv TFA, b) *P*- or *M*-R3 + 5.0 equiv TFA + 5.5 equiv TEA.

## 9. NMR study of photo controlled motion of R2 and R3

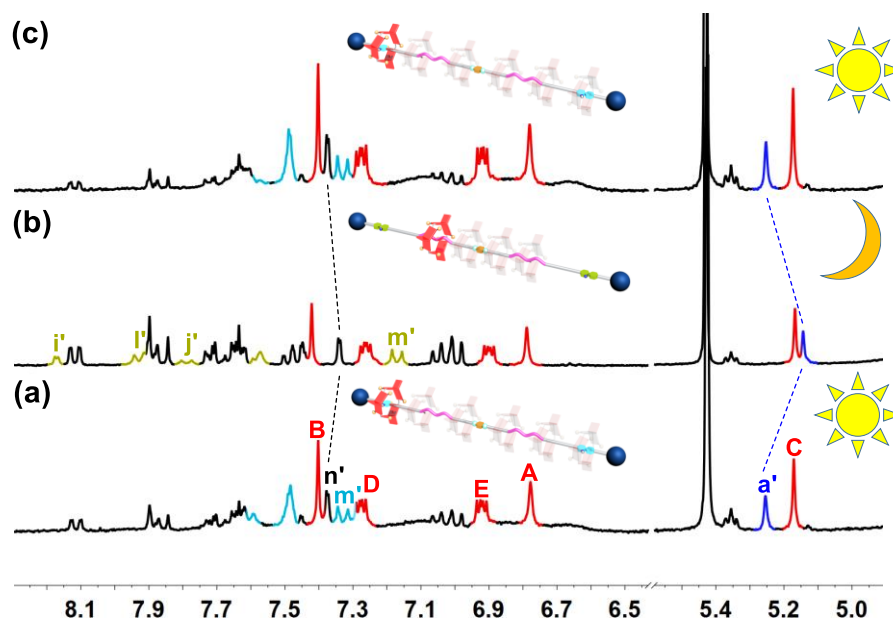

**Fig. S44** Partial  $^1\text{H}$  NMR spectra (CD<sub>3</sub>OD/CD<sub>2</sub>Cl<sub>2</sub> = 11:5 v/v, 298 K, 300 MHz) of (a) **R2** + 2.3 equiv **1-SP**, (b) **R2** + 2.3 equiv **1-SP** in the dark for 3.5 h, (c) b was irradiated by 420 nm or sunlight for 5 min.

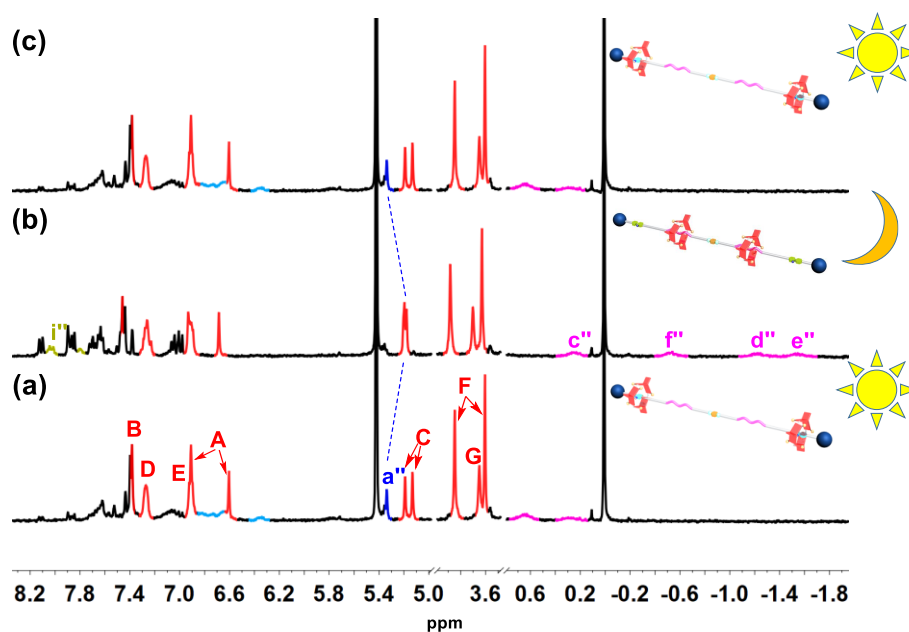

**Fig. S45** Partial  $^1\text{H}$  NMR spectra (CD<sub>3</sub>OD/CD<sub>2</sub>Cl<sub>2</sub> = 11:5 v/v, 298 K, 300 MHz) of (a) **R3** + 2.3 equiv **1-SP**, (b) **R3** + 2.3 equiv **1-SP** in the dark for 3.5 h, (c) b was irradiated by 420 nm or sunlight for 5 min.

## 10. Time-dependent $^1\text{H}$ NMR study of photo-driven motion

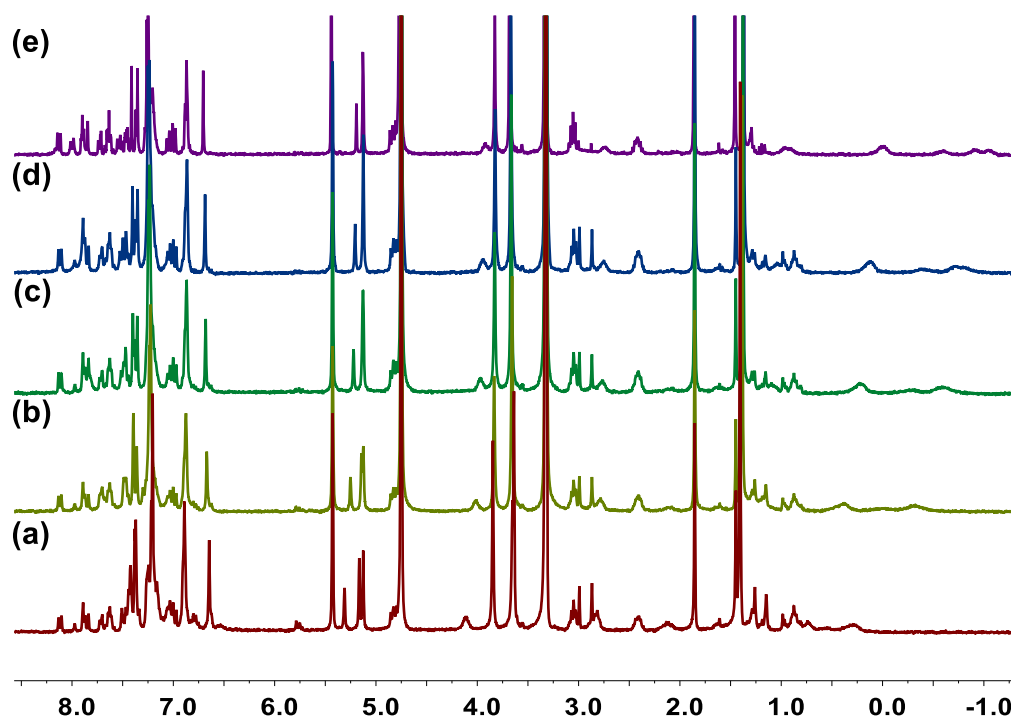

**Fig. S46.**  $^1\text{H}$  NMR spectra (300 MHz, 298 K,  $\text{CD}_3\text{OD}/\text{CD}_2\text{Cl}_2 = 11/5$  v/v) of **R1-H** and **1-SP** treated in the dark for (a) 20 min, (b) 40 min, (c) 60 min, (d) 80 min and (e) 150 min.

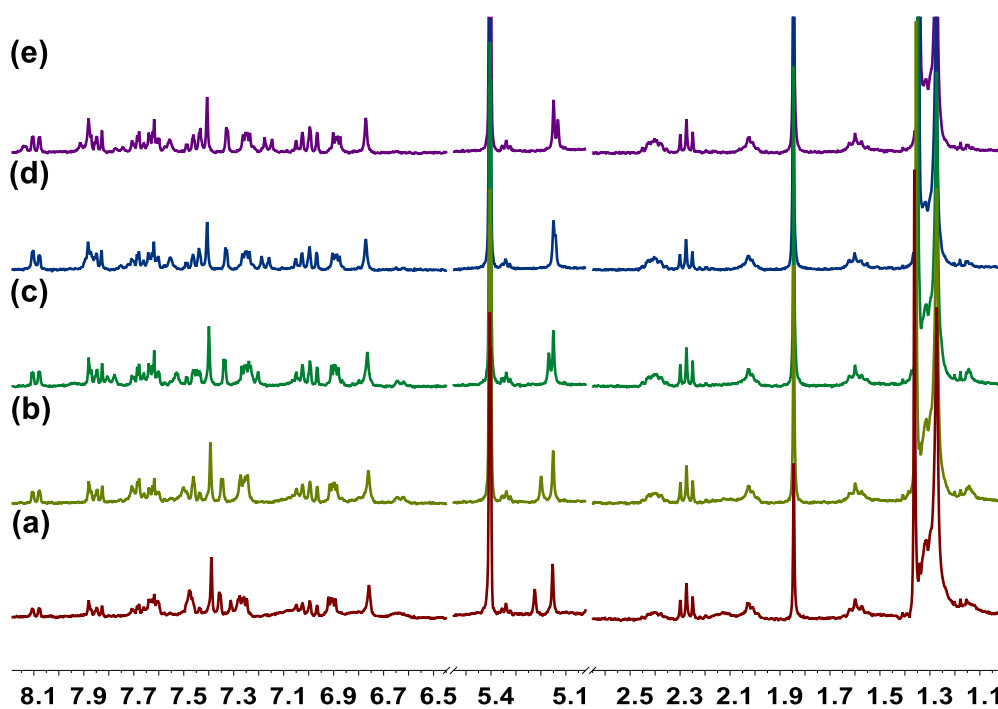

**Fig. S47.**  $^1\text{H}$  NMR spectra (300 MHz, 298 K,  $\text{CD}_3\text{OD}/\text{CD}_2\text{Cl}_2 = 11/5$  v/v) of **R2-H** and **1-SP** treated in the dark for (a) 10 min, (b) 20 min, (c) 30 min, (d) 55 min and (e) 85 min.



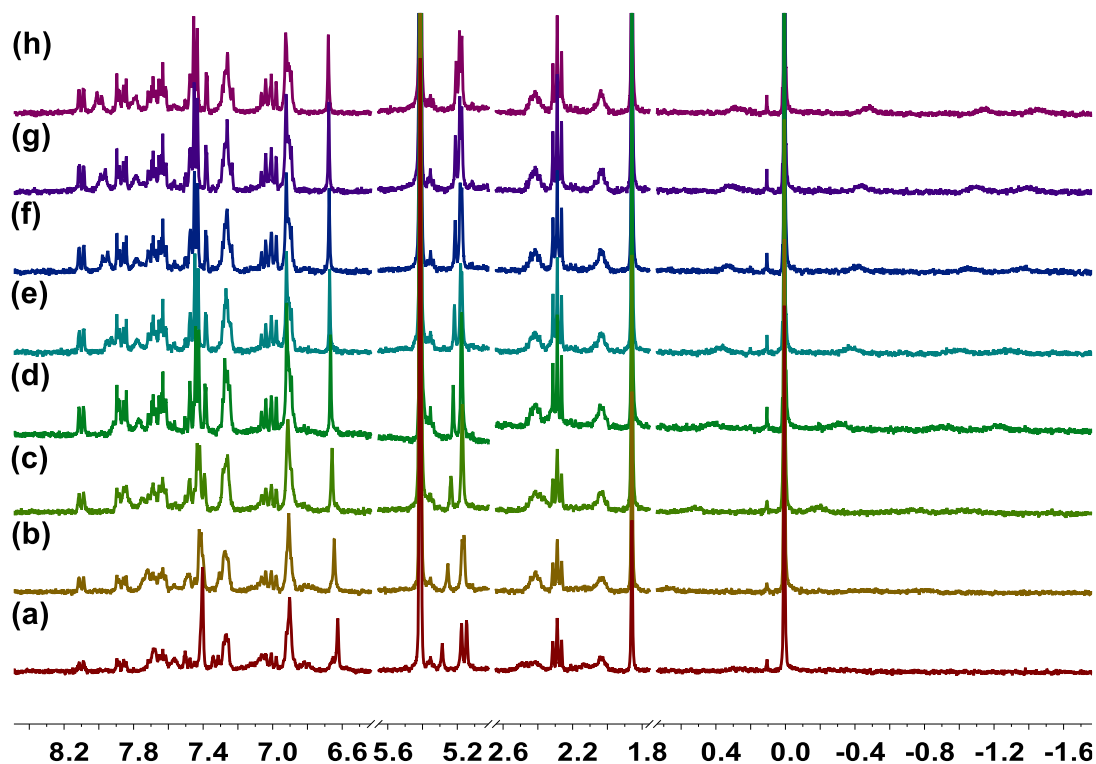

**Fig. S48.**  $^1\text{H}$  NMR spectra (300 MHz, 298 K,  $\text{CD}_3\text{OD}/\text{CD}_2\text{Cl}_2 = 11/5$  v/v) of **R3-H** and **1-SP** treated in the dark for (a) 10 min, (b) 20 min, (c) 30 min, (d) 40 min (e) 50 min, (f) 60 min, (g) 70 min, (h) 130 min.

## 11. Sustainability of acid-base controlled and photo controlled motion patterns

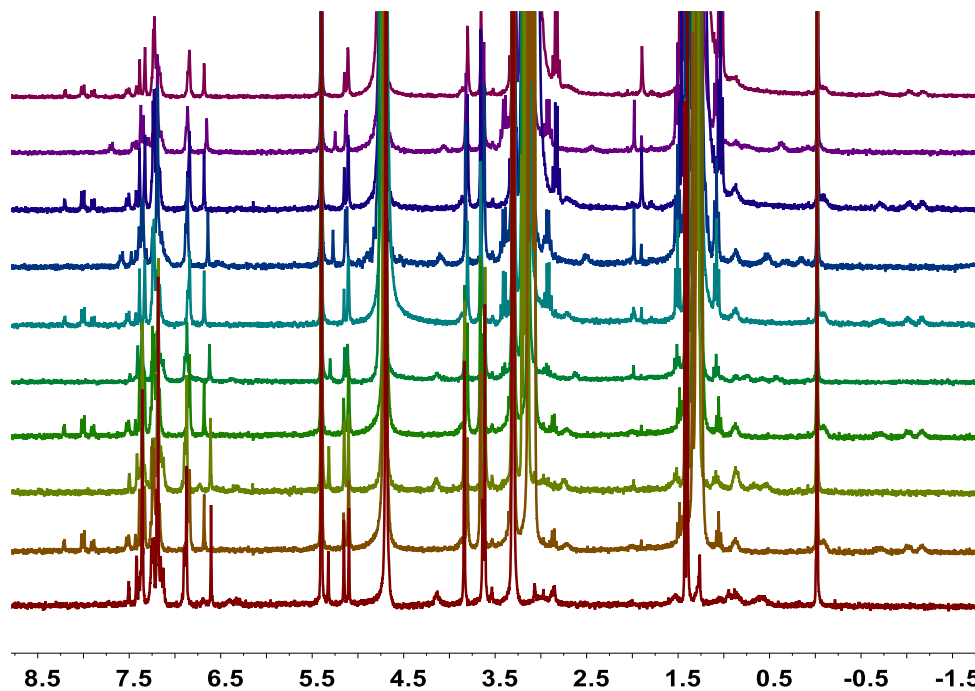

**Fig. S49.** Five motion cycles of **R1** induced through alternating TEA and TFA.

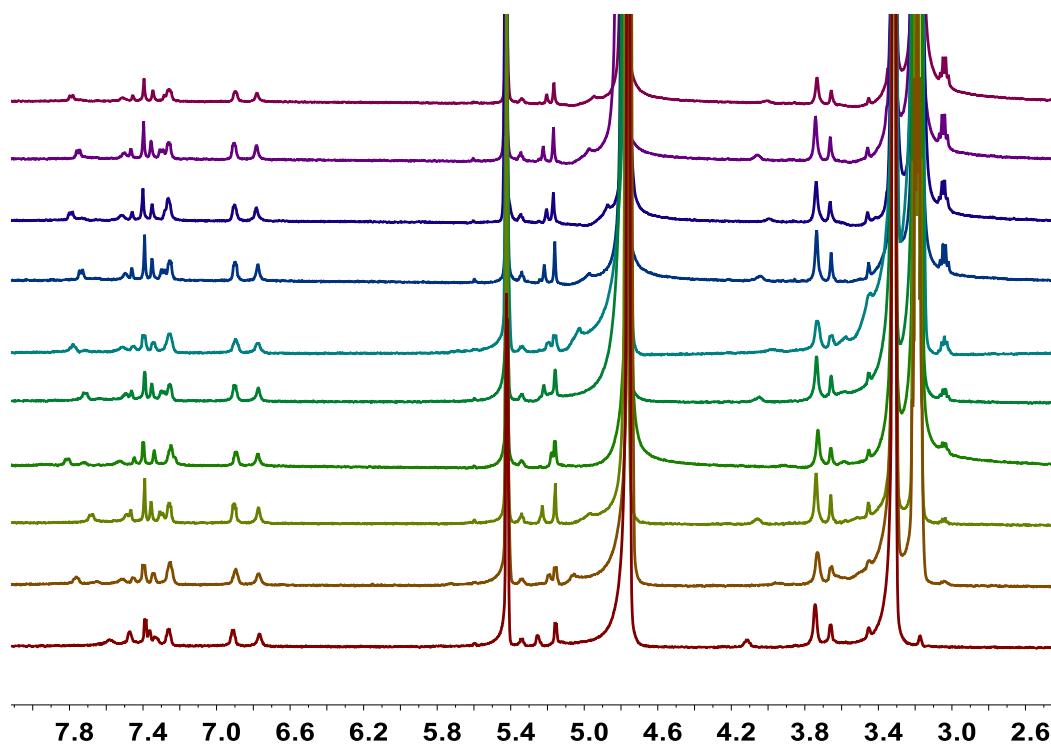

**Fig. S50.** Five motion cycles of **R2** induced through alternating TEA and TFA.

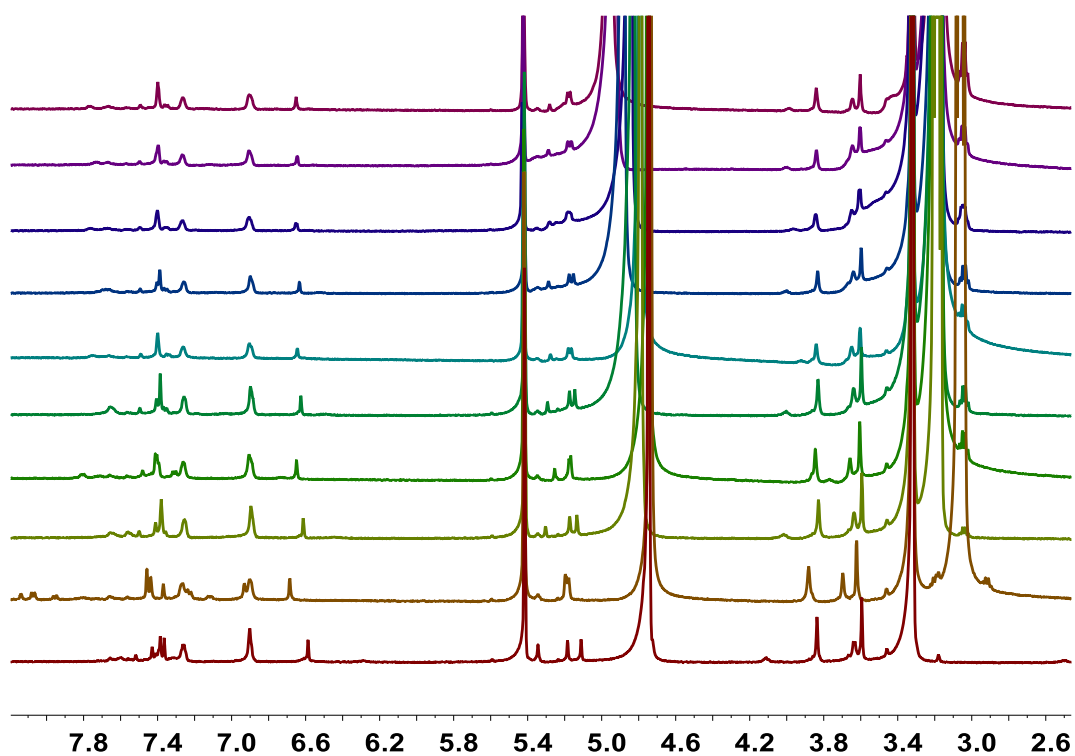

**Fig. S51.** Five motion cycles of **R3** induced through alternating TEA and TFA.

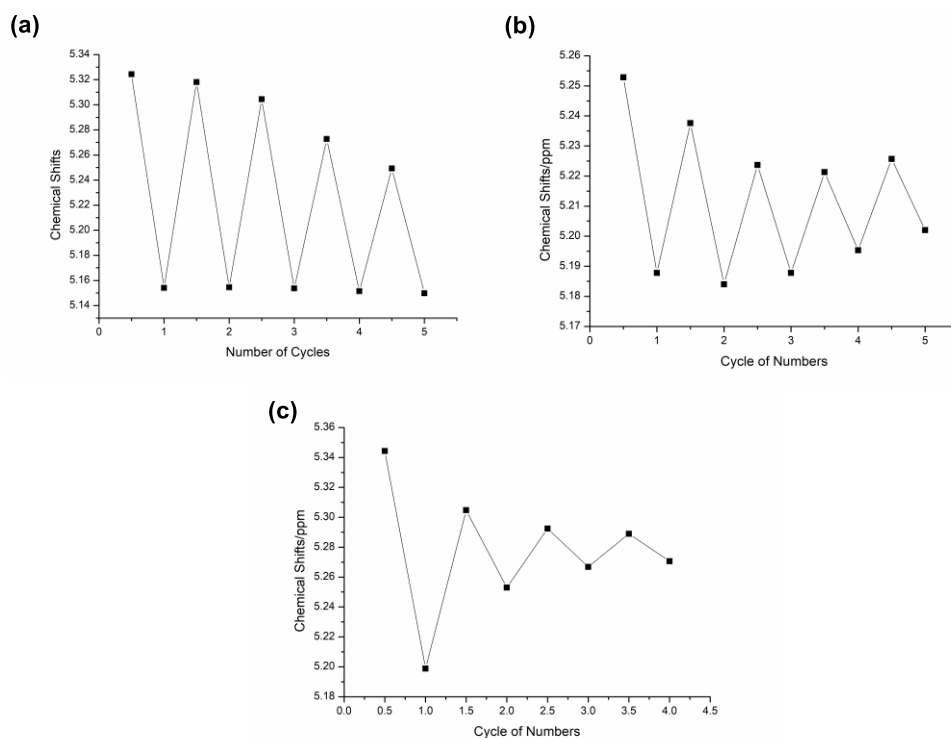

**Fig. S52.** Sustainability of acid-base controlled motion of (a) **R1**, (b) **R2** and (c) **R3**. Recorded  $H^a$  for **R1**,  $H^{a'}$  for **R2** and  $H^{a''}$  for **R3**.

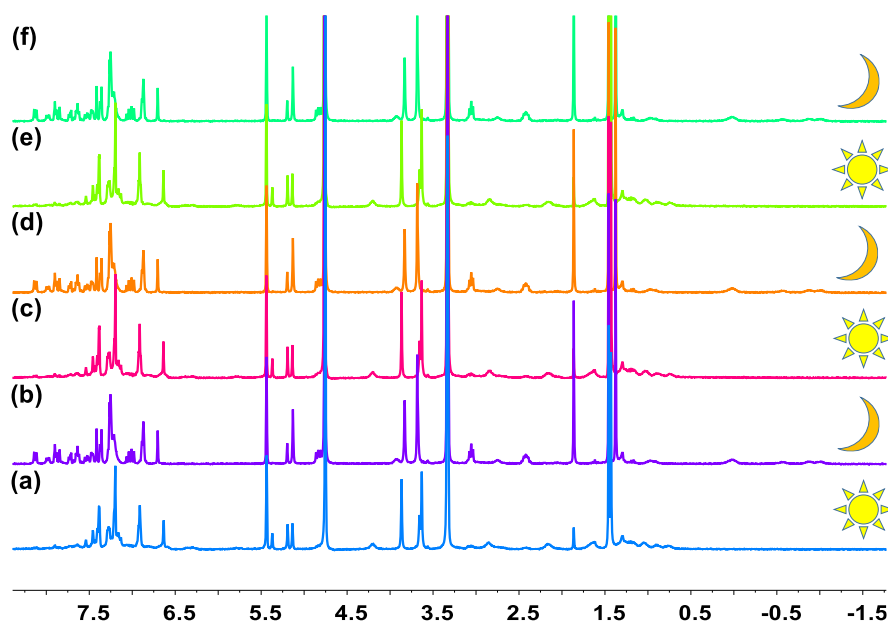

**Fig. S53.** Motion cycles of **R1** induced by photo in the presence of photoacid (300 MHz, 298 K,  $CD_3OD/CD_2Cl_2 = 11/5$  v/v). (a) and (b) is the first cycle, (c) and (d) is the cycle 2, and (e) and (f) is the cycle 50.

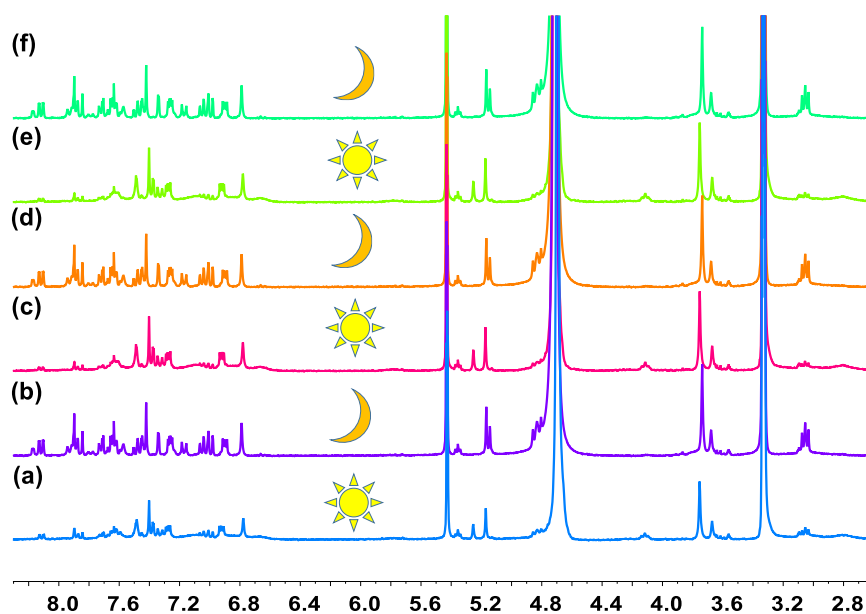

**Fig. S54.** Motion cycles of **R2** induced by photo in the present of photoacid (300 MHz, 298 K,  $\text{CD}_3\text{OD}/\text{CD}_2\text{Cl}_2 = 11/5$  v/v). (a) and (b) is the first cycle, (c) and (d) is the cycle 2, and (e) and (f) is the cycle 50.

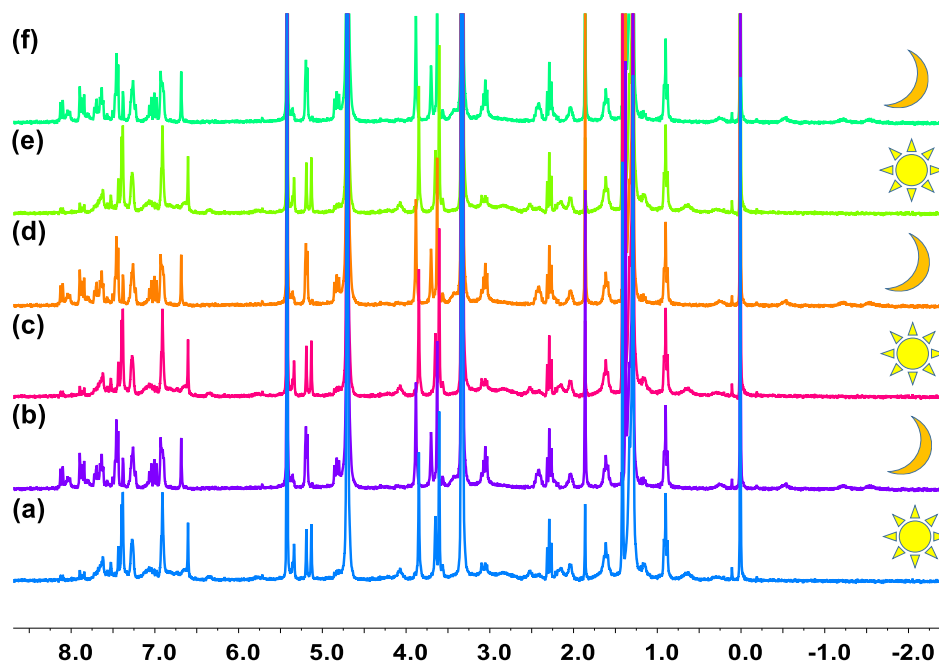

**Fig. S55.** Motion cycles of **R3** induced by photo in the present of photoacid (300 MHz, 298 K,  $\text{CD}_3\text{OD}/\text{CD}_2\text{Cl}_2 = 11/5$  v/v). (a) and (b) is the first cycle, (c) and (d) is the cycle 2, and (e) and (f) is the cycle 50.

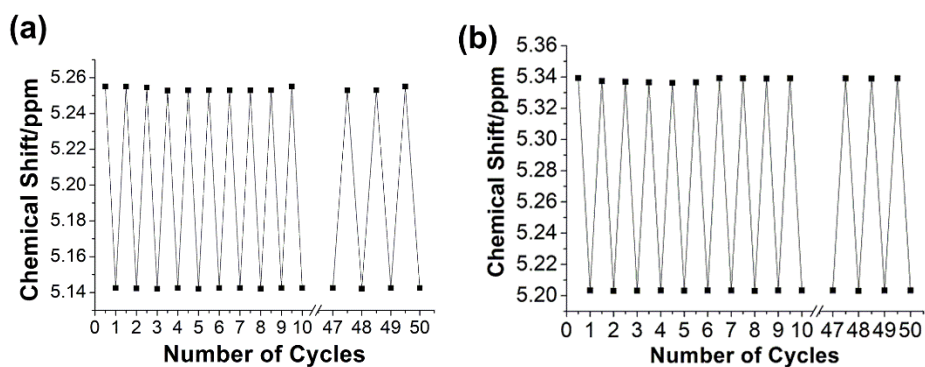

**Fig. S56.** Sustainability of photo controlled motion of (a) **R2** and (b) **R3**. Recorded  $H^a$  for **R2** and  $H^{a''}$  for **R3**.

## Reference

**S1.** G. W. Zhang, P.-F. Li, Z. Meng, H.-X. Wang, Y. Han and C.-F. Chen, *Angew. Chem., Int. Ed.*, 2016, **55**, 5304-5394.
